# Supplementary material for: Cu(OAc)2 catalysed aerobic oxidation of aldehydes to nitriles under ligand-free conditions
Source: Royal Society of Chemistry journal article supplement (doi:10.1039/d1ra07701e), 2022-01-01
Supplement: d1ra07701e1.pdf [file d1ra07701e1.pdf]

## SUPPORTING INFORMATION

### **Cu(OAc)<sub>2</sub> Catalysed Aerobic Oxidation of Aldehydes to Nitriles under Ligand-Free Condition**

Asit Kumar Das<sup>a</sup>, Sneha Nandy<sup>b</sup> and Sanjay Bhar<sup>b,\*</sup>

<sup>a</sup> Department of Chemistry, Krishnath College, Berhampore, Murshidabad, 742101, India.

<sup>b</sup> Department of Chemistry, Organic Chemistry Section, Jadavpur University, Kolkata 700032, India.

[E-mail: [sanjaybharin@yahoo.com](mailto:sanjaybharin@yahoo.com), [sanjay.bhar@jadavpuruniversity.in](mailto:sanjay.bhar@jadavpuruniversity.in)]

### **Experimental Section**

#### **Materials and methods**

All reactants were purchased from SRL, AVRA Chemicals, Alfa-aesar, Spectrochem, and Sigma Aldrich and used as received without further purification. <sup>1</sup>H and <sup>13</sup>C NMR spectra were obtained on a Bruker-300 spectrometer (300 MHz and 400 MHz) and JEOL Spectrometer (500 MHz) in CDCl<sub>3</sub> and DMSO-*d*<sub>6</sub> solutions with TMS as an internal reference. Melting points were determined in open capillary on electrical bath which is uncorrected. Column chromatography was performed on silica gel (60-120 mesh) from SRL, India. Thin layer chromatographic separations were performed on pre-coated silica gel plates using silica gel G for TLC (E. Merck).

#### **General experimental procedure for the Cu(OAc)<sub>2</sub> catalyzed oxidative transformation of aldehydes to nitriles:**

To a stirred suspension of aldehyde **1** (1.0 mmol) and ammonium acetate (1.5 mmol) in DMSO (3 mL), Cu(OAc)<sub>2</sub> (10 mol %) was added. The reaction mixture was stirred for an appropriate time at 60°C under ambient atmosphere. The progress of the reaction was monitored with TLC. Then the reaction mixture was cooled to room temperature, ethyl acetate (15 mL) was

added to dissolve the product. The reaction mixture was repeatedly extracted with ethyl acetate (3×5 mL). The combined organic extracts were washed with water (3×5 mL) and dried over anhydrous Na<sub>2</sub>SO<sub>4</sub>. The crude product **2** was obtained by removal of the solvent under reduced pressure which was further purified by column chromatography on a short column of silica gel using 1-10% ethyl acetate-hexane as eluent.

#### **Procedure for the Cu(OAc)<sub>2</sub> catalyzed gram-scale synthesis of nitrile (2a):**

To a stirred suspension of 4-methoxybenzaldehyde **1a** (20.0 mmol, 2.723 g) and ammonium acetate (30.0 mmol, 2.310 g) in DMSO (60 mL), Cu(OAc)<sub>2</sub> (0.336 g, 10 mol %) was added and the reaction mixture was stirred for the appropriate time at 60°C under ambient atmosphere. The progress of the reaction was monitored with TLC. Then the reaction mixture was cooled to room temperature, ethyl acetate (300 mL) was added to dissolve the product. The reaction mixture was repeatedly extracted with ethyl acetate (3×100 mL). The combined organic extracts were washed with water (3× 100 mL). After drying with anhydrous sodium sulfate, the solvent was removed under reduced pressure to furnish the crude product **2a**, which was further purified by column chromatography of silica gel using ethyl acetate-hexane as eluent. (Yield: 89%, 2.370 g).

#### **Determination of Reaction Order:**

To determine the order of the reaction, two identical experiments were carried out following the general procedure varying only the concentration of 4-methoxybenzaldehyde **1a**. The initial rate of the reaction for the different run was calculated to determine the order with respect to aldehyde **1a**.

**Table S1** Experimental details to determine the reaction order

| Run   | 4-methoxybenzaldehyde <b>1a</b> | NH <sub>4</sub> OAc | Cu(OAc) <sub>2</sub> | DMSO |
|-------|---------------------------------|---------------------|----------------------|------|
| Run 1 | 1 mmol                          | 1.5 mmol            | 10 mol%              | 3 mL |
| Run 2 | 2 mmol                          | 1.5 mmol            | 10 mol%              | 3 mL |

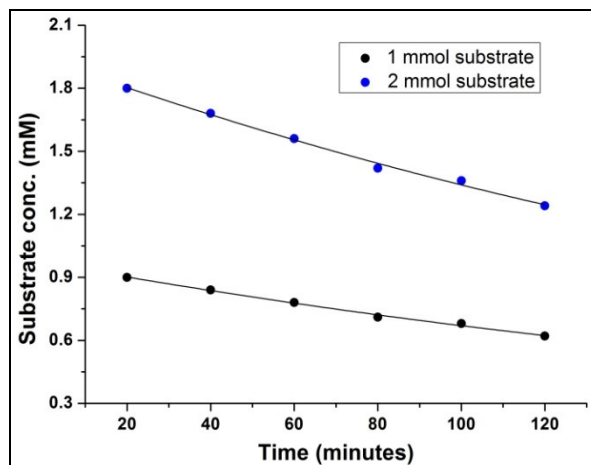

**Figure S1** Dependence of [4-methoxybenzaldehyde] on the initial rate of the reaction using  $\text{Cu}(\text{OAc})_2$  (10 mol%),  $\text{NH}_4\text{OAc}$  (1.5 mmol), DMSO (3 mL),  $60^\circ\text{C}$ , under ambient condition.

Initial slope for Run 1 at 60 minutes =  $0.0135 = 13.5 \times 10^{-3}$  (mM)/min

Initial slope for Run 2 at 60 minutes =  $0.0269 = 26.9 \times 10^{-3}$  (mM)/min

Simplified rate equation for this system  $(r) = k [\text{4-methoxybenzaldehyde}]^a [\text{NH}_4\text{OAc}]^b [\text{Cu}(\text{OAc})_2]^c [\text{DMSO}]^d$   
(all terms have their usual significance)

Now for Run 1,  $r_1 = 13.5 \times 10^{-3}$  (mM)/min =  $k [1]^a [\text{NH}_4\text{OAc}]^b [\text{Cu}(\text{OAc})_2]^c [\text{DMSO}]^d$   
.....(1)

Now for Run 2,  $r_2 = 26.9 \times 10^{-3}$  (mM)/min =  $k [2]^a [\text{NH}_4\text{OAc}]^b [\text{Cu}(\text{OAc})_2]^c [\text{DMSO}]^d$   
.....(2)

Comparing the initial rate,

$$r_1/r_2 = (13.5/26.9) = (1/2)^a$$

$$\text{or, } 0.502 = 0.5^a$$

$$\text{or, } \log 0.502 = a \log 0.5$$

$$\text{or, } a = \log 0.502 / \log 0.5$$

$$\text{or, } a = -0.299 / -0.301$$

$$\text{or, } a = 0.99 - 1$$

So, Rate =  $k [\text{4-methoxybenzaldehyde}]^1$

The kinetic studies showed that the reaction rate depends on the concentration of 4-methoxybenzaldehyde **1a** only. Therefore, the aforesaid oxidative protocol follows first order kinetics.

### Spectral and analytical data of the compounds:

**4-methoxybenzonitrile (2a)**<sup>1</sup>: Yield: 90%; White solid; Mp 57-59 °C (Lit.<sup>10</sup> 58-60 °C); <sup>1</sup>H NMR (CDCl<sub>3</sub>, 300 MHz); δ (ppm): 7.57 (2H, d, *J* = 8.4 Hz); 6.93 (2H, d, *J* = 8.4 Hz); 3.84 (3H, s). <sup>13</sup>C NMR (CDCl<sub>3</sub>, 75 MHz); δ (ppm): 159.3, 131.5, 119.6, 117.1, 114.0, 56.1.

**4-tolunitrile (2b)**<sup>1</sup>: Yield: 91%; Colorless liquid; <sup>1</sup>H NMR (CDCl<sub>3</sub>, 300 MHz); δ (ppm): 7.50 (2H, d, *J* = 7.8 Hz); 7.24 (2H, d, *J* = 7.8 Hz); 2.38 (3H, s). <sup>13</sup>C NMR (CDCl<sub>3</sub>, 75 MHz); δ (ppm): 145.1, 132.6, 128.9, 119.8, 111.6, 22.5.

**2-tolunitrile (2c)**<sup>1</sup>: Yield: 89%; Colorless liquid; <sup>1</sup>H NMR (CDCl<sub>3</sub>, 300 MHz); δ (ppm): 7.44-7.59 (2H, m); 7.23-7.31 (2H, m); 2.53 (3H, s). <sup>13</sup>C NMR (CDCl<sub>3</sub>, 75 MHz); δ (ppm): 141.9, 132.6, 132.4, 130.2, 126.2, 118.1, 112.7, 20.4.

**Benzonitrile (2d)**<sup>2</sup>: Yield: 90%; Colorless liquid; <sup>1</sup>H NMR (CDCl<sub>3</sub>, 300 MHz); δ (ppm): 7.57-7.64 (3H, m); 7.43-7.48 (2H, m). <sup>13</sup>C NMR (CDCl<sub>3</sub>, 75 MHz); δ (ppm): 133.9, 133.1, 129.6, 119.5, 113.4.

**3, 4-dimethoxybenzonitrile (2e)**<sup>2</sup>: Yield: 90%; White solid; Mp 70-72 °C (Lit.<sup>10</sup> 69-71 °C); <sup>1</sup>H NMR (CDCl<sub>3</sub>, 300 MHz); δ (ppm): 7.24 (1H, d, *J* = 1.5 Hz); 7.04 (1H, s); 6.87 (1H, d, *J* = 8.1 Hz); 3.94 (3H, s); 3.90 (3H, s). <sup>13</sup>C NMR (CDCl<sub>3</sub>, 75 MHz); δ (ppm): 152.8, 149.4, 126.5, 119.1, 113.8, 111.2, 103.6, 56.0, 55.8.

**4-hydroxy-3-methoxybenzonitrile (2f)**<sup>3</sup>: Yield: 89%; White solid; Mp 88-90 °C (Lit.<sup>10</sup> 87-89 °C); <sup>1</sup>H NMR (CDCl<sub>3</sub>, 300 MHz); δ (ppm): 7.19 (1H, d, *J* = 7.5 Hz); 7.06 (1H, s); 6.92 (1H, d, *J* = 7.8 Hz); 3.89 (3H, s). <sup>13</sup>C NMR (CDCl<sub>3</sub>, 75 MHz); δ (ppm): 150.1, 146.8, 127.5, 119.3, 113.9, 109.0, 103.1, 56.2.

**4-hydroxybenzotrile (2g)**<sup>3</sup>: Yield: 87%; White solid; Mp 110-112 °C (Lit.<sup>10</sup> 111-112 °C); <sup>1</sup>H NMR (CDCl<sub>3</sub>, 300 MHz); δ (ppm): 7.54 (2H, d, *J* = 8.4 Hz); 6.94 (2H, d, *J* = 8.4 Hz). <sup>13</sup>C NMR (CDCl<sub>3</sub>, 75 MHz); δ (ppm): 160.5, 134.3, 119.3, 116.5, 102.7.

**3-hydroxybenzotrile (2h)**<sup>4</sup>: Yield: 89%; White solid; Mp 79-81 °C; <sup>1</sup>H NMR (DMSO-d<sub>6</sub>, 300 MHz); δ (ppm): 7.28-7.33 (2H, m); 7.19 (1H, s); 7.09-7.17 (1H, m). <sup>13</sup>C NMR (DMSO-d<sub>6</sub>, 75 MHz); δ (ppm): 156.5, 131.2, 124.7, 121.2, 119.5, 117.8, 110.4.

**2-hydroxybenzotrile (2i)**<sup>3</sup>: Yield: 88%; White solid; Mp 97-99 °C (Lit.<sup>11</sup> 96-98 °C); <sup>1</sup>H NMR (CDCl<sub>3</sub>, 300 MHz); δ (ppm): 7.48-7.51 (2H, m); 6.95-6.98 (2H, m); 4.89 (1H, br s). <sup>13</sup>C NMR (CDCl<sub>3</sub>, 75 MHz); δ (ppm): 158.8, 134.7, 132.9, 120.7, 119.1, 116.7, 102.8.

**4-(dimethylamino)benzotrile (2j)**<sup>3</sup>: Yield: 88%; White solid; Mp 70-72 °C (Lit.<sup>5</sup> 71-73 °C); <sup>1</sup>H NMR (CDCl<sub>3</sub>, 300 MHz); δ (ppm): 7.45 (2H, d, *J* = 8.7 Hz); 6.63 (2H, d, *J* = 8.7 Hz). <sup>13</sup>C NMR (CDCl<sub>3</sub>, 75 MHz); δ (ppm): 152.5, 133.6, 120.6, 111.8, 97.4, 39.8.

**2-aminobenzotrile (2k)**<sup>5</sup>: Yield: 89%; Yellow solid; Mp 48-50 °C (Lit.<sup>5</sup> 49-51 °C); <sup>1</sup>H NMR (CDCl<sub>3</sub>, 300 MHz); δ (ppm): 7.29-7.38 (2H, m); 6.70-6.75 (2H, m); 4.41 (2H, br s). <sup>13</sup>C NMR (CDCl<sub>3</sub>, 75 MHz); δ (ppm): 149.7, 134.0, 132.4, 117.9, 117.6, 115.2, 95.9.

**4-chlorobenzotrile (2l)**<sup>1</sup>: Yield: 93%; White solid; Mp 92-94 °C (Lit.<sup>5</sup> 91-93 °C); <sup>1</sup>H NMR (CDCl<sub>3</sub>, 300 MHz); δ (ppm): 7.60 (2H, d, *J* = 8.4 Hz); 7.46 (2H, d, *J* = 8.4 Hz). <sup>13</sup>C NMR (CDCl<sub>3</sub>, 75 MHz); δ (ppm): 139.3, 132.8, 129.2, 118.8, 110.3.

**4-bromobenzotrile (2m)**<sup>1</sup>: Yield: 91%; White solid; Mp 108-110 °C (Lit.<sup>5</sup> 109-111 °C); <sup>1</sup>H NMR (CDCl<sub>3</sub>, 300 MHz); δ (ppm): 7.62 (2H, d, *J* = 8.4 Hz); 7.51 (2H, d, *J* = 8.4 Hz). <sup>13</sup>C NMR (CDCl<sub>3</sub>, 75 MHz); δ (ppm): 133.4, 132.6, 127.9, 118.0, 111.3.

**4-nitrobenzotrile (2n)**<sup>1</sup>: Yield: 95%; Yellow solid; Mp 147-150 °C (Lit.<sup>5</sup> 146-148 °C); <sup>1</sup>H NMR (CDCl<sub>3</sub>, 300 MHz); δ (ppm): 8.36 (2H, d, *J* = 8.7 Hz); 7.88 (2H, d, *J* = 8.7 Hz). <sup>13</sup>C NMR (CDCl<sub>3</sub>, 75 MHz); δ (ppm): 150.1, 133.5, 124.2, 118.3, 116.8.

**3-nitrobenzotrile (2o)**<sup>3</sup>: Yield: 94%; White solid; Mp 114-116 °C (Lit.<sup>11</sup> 115-116 °C); <sup>1</sup>H NMR (CDCl<sub>3</sub>, 300 MHz); δ (ppm): 7.18-7.25 (1H, m); 7.00 (1H, d, *J* = 7.5 Hz); 6.84-6.89 (2H, m). <sup>13</sup>C NMR (CDCl<sub>3</sub>, 75 MHz); δ (ppm): 147.0, 130.1, 121.9, 119.2, 117.4, 112.8.

**4-formylbenzotrile (2p)**<sup>5</sup>: Yield: 88%; White solid; Mp 98-100 °C (Lit.<sup>5</sup> 100-101 °C); <sup>1</sup>H NMR (CDCl<sub>3</sub>, 300 MHz); δ (ppm): 10.1 (1H, s); 7.98 (2H, d, *J* = 8.1 Hz); 7.84 (2H, d, *J* = 8.1 Hz). <sup>13</sup>C NMR (CDCl<sub>3</sub>, 75 MHz); δ (ppm): 190.6, 138.7, 132.9, 130.6, 129.9, 117.6.

**Terephthalonitrile (2q)**<sup>5</sup>: Yield: 87%; White solid; Mp 225-227 °C (Lit.<sup>5</sup> 224-226 °C); <sup>1</sup>H NMR (CDCl<sub>3</sub>, 300 MHz); δ (ppm): 7.52 (s, 4H). <sup>13</sup>C NMR (CDCl<sub>3</sub>, 75 MHz); δ (ppm): 132.7, 118.2, 116.6.

**4-acetylbenzotrile (2r)**<sup>5</sup>: Yield: 88%; Light yellow solid; Mp 56-58 °C (Lit.<sup>5</sup> 55-57 °C); <sup>1</sup>H NMR (CDCl<sub>3</sub>, 300 MHz); δ (ppm): 8.03 (2H, d, *J* = 8.1 Hz); 7.77 (2H, d, *J* = 8.1 Hz); 2.64 (3H, s). <sup>13</sup>C NMR (CDCl<sub>3</sub>, 75 MHz); δ (ppm): 196.6, 139.9, 132.5, 128.7, 117.9, 116.3, 26.7.

**1-naphthonitrile (2s)**<sup>6</sup>: Yield: 86%; White solid; Mp 33-35 °C (Lit.<sup>5</sup> 35-37 °C); <sup>1</sup>H NMR (CDCl<sub>3</sub>, 300 MHz); δ (ppm): 8.21 (1H, d, *J* = 8.4 Hz), 8.02 (1H, d, *J* = 8.6 Hz), 7.76–7.83 (4H, m), 7.48 (1H, t, *J* = 7.8 Hz). <sup>13</sup>C NMR (75 MHz, CDCl<sub>3</sub>); δ (ppm): 133.5, 132.9, 132.1, 131.8, 128.7, 128.1, 127.0, 125.6, 124.7, 118.1, 110.2.

**Benzo[d][1,3]dioxole-5-carbonitrile (2t)**<sup>1</sup>: Yield: 88%; White solid; Mp 92-94 °C; <sup>1</sup>H NMR (CDCl<sub>3</sub>, 300 MHz); δ (ppm): 7.41 (1H, s); 7.14-7.20 (1H, m), 6.98 (1H, d, *J* = 8.2 Hz), 6.01 (2H, s). <sup>13</sup>C NMR (75 MHz, CDCl<sub>3</sub>); δ (ppm): 150.6, 148.2, 127.9, 119.0, 111.1, 108.8, 105.7, 101.3.

**Cinnamonitrile (2u)**<sup>2</sup>: Yield: 83%; Colorless oil; <sup>1</sup>H NMR (CDCl<sub>3</sub>, 400 MHz); δ (ppm): 7.37-7.49 (6H, m), 5.83 (1H, d, *J* = 16.3 Hz). <sup>13</sup>C NMR (100 MHz, CDCl<sub>3</sub>); δ (ppm): 150.1, 132.9, 131.4, 129.3, 127.5, 118.8, 95.8.

**Furan-2-carbonitrile (2v)**<sup>1</sup>: Yield: 79%; Viscous oil; <sup>1</sup>H NMR (CDCl<sub>3</sub>, 400 MHz); δ (ppm): 7.58 (1H, d, *J* = 1.5 Hz), 6.96-7.02 (2H, m). <sup>13</sup>C NMR (100 MHz, CDCl<sub>3</sub>); δ (ppm): 147.5, 132.2, 125.3, 119.8, 111.6.

**Thiophene-2-carbonitrile (2w)**<sup>1</sup>: Yield: 81%; Colorless liquid; <sup>1</sup>H NMR (CDCl<sub>3</sub>, 400 MHz); δ (ppm): 7.60 (2H, d, *J* = 4.3 Hz), 7.01-7.06 (1H, m). <sup>13</sup>C NMR (100 MHz, CDCl<sub>3</sub>); δ (ppm): 138.2, 131.4, 126.5, 118.1, 109.2.

**Picolinonitrile (2x)**<sup>6</sup>: Yield: 83%; Colorless liquid; <sup>1</sup>H NMR (CDCl<sub>3</sub>, 300 MHz); δ (ppm): 8.72 (1H, d, *J* = 4.5 Hz), 7.62-7.71 (3H, m). <sup>13</sup>C NMR (75 MHz, CDCl<sub>3</sub>); δ (ppm): 151.3, 135.7, 133.3, 127.6, 124.9, 117.6.

**Isonicotinonitrile (2y)**<sup>7</sup>: Yield: 80%; White solid; Mp 78-79 °C (Lit.<sup>10</sup> 77-78 °C); <sup>1</sup>H NMR (CDCl<sub>3</sub>, 300 MHz); δ (ppm): 8.82 (2H, d, *J* = 13.5 Hz); 7.55 (2H, d, *J* = 13.5 Hz). <sup>13</sup>C NMR (CDCl<sub>3</sub>, 75 MHz); δ (ppm): 152.3, 126.8, 120.7, 117.3.

**4-(benzyloxy)benzonitrile (2z)**<sup>6</sup>: Yield: 86%; White solid; Mp 95-98 °C; <sup>1</sup>H NMR (CDCl<sub>3</sub>, 300 MHz); δ (ppm): 7.59-7.63 (2H, m); 7.38-7.44 (5H, m); 7.00-7.07 (2H, m); 5.14 (2H, s). <sup>13</sup>C NMR (CDCl<sub>3</sub>, 75 MHz); δ (ppm): 161.9, 135.7, 134.0, 128.7, 128.4, 127.5, 119.2, 115.6, 104.3, 70.3.

**4-(allyloxy)-3-methoxybenzonitrile (2za)**<sup>8</sup>: Yield: 84%; Light yellow liquid; <sup>1</sup>H NMR (CDCl<sub>3</sub>, 300 MHz); δ (ppm): 7.24 (1H, d, *J* = 9.0 Hz); 7.08 (1H, s); 6.88 (1H, d, *J* = 8.4 Hz); 6.00-6.11 (1H, m); 5.31-5.45 (2H, m); 4.65 (2H, d, *J* = 4.8 Hz); 3.88 (3H, s). <sup>13</sup>C NMR (CDCl<sub>3</sub>, 75 MHz); δ (ppm): 151.9, 149.5, 132.1, 126.2, 119.2, 118.8, 114.3, 112.9, 104.0, 69.7, 56.2.

**4-((tert-butyldimethylsilyloxy)-3-methoxybenzonitrile (2zb)**<sup>9</sup>: Yield: 85%; Colorless liquid; <sup>1</sup>H NMR (CDCl<sub>3</sub>, 300 MHz); δ (ppm): 7.05 (1H, s); 6.94 (2H, m); 3.89 (3H, s); 0.88 (9H, s); 0.06 (6H, s). <sup>13</sup>C NMR (CDCl<sub>3</sub>, 75 MHz); δ (ppm): 150.2, 146.9, 126.9, 119.2, 115.4, 113.9, 103.1, 56.2, 25.6, 17.9, -3.64.

**Heptanenitrile (2zc)**<sup>3</sup>: Yield: 78%; Colorless liquid; <sup>1</sup>H NMR (CDCl<sub>3</sub>, 300 MHz); δ (ppm): 1.56 (3H, t); 1.24-1.30 (7H, m); 0.88 (3H, t). <sup>13</sup>C NMR (CDCl<sub>3</sub>, 75 MHz); δ (ppm): 119.2, 31.9, 30.5, 29.3, 28.8, 22.6, 14.0.

**Pentanenitrile (2zd)**<sup>12</sup>: Yield: 79%; Colorless liquid; <sup>1</sup>H NMR (CDCl<sub>3</sub>, 500 MHz); δ (ppm): 2.32 (2H, t, *J* = 7.2 Hz); 1.61-1.63 (2H, m); 1.46-1.47 (2H, m); 0.93 (3H, t, *J* = 7.4 Hz). <sup>13</sup>C NMR (CDCl<sub>3</sub>, 125 MHz); δ (ppm): 119.9, 27.4, 21.9, 16.9, 13.3.

**2-Phenylacetonitrile (2ze)**<sup>6</sup>: Yield: 84%; Colorless liquid; <sup>1</sup>H NMR (CDCl<sub>3</sub>, 500 MHz); δ (ppm): 7.32-7.36 (5H, m); 3.74 (2H, s). <sup>13</sup>C NMR (CDCl<sub>3</sub>, 125 MHz); δ (ppm): 130.0, 129.2, 128.1, 128.0, 117.9, 23.7.



# <sup>1</sup>H NMR & <sup>13</sup>C NMR Spectra of the Representative Compounds

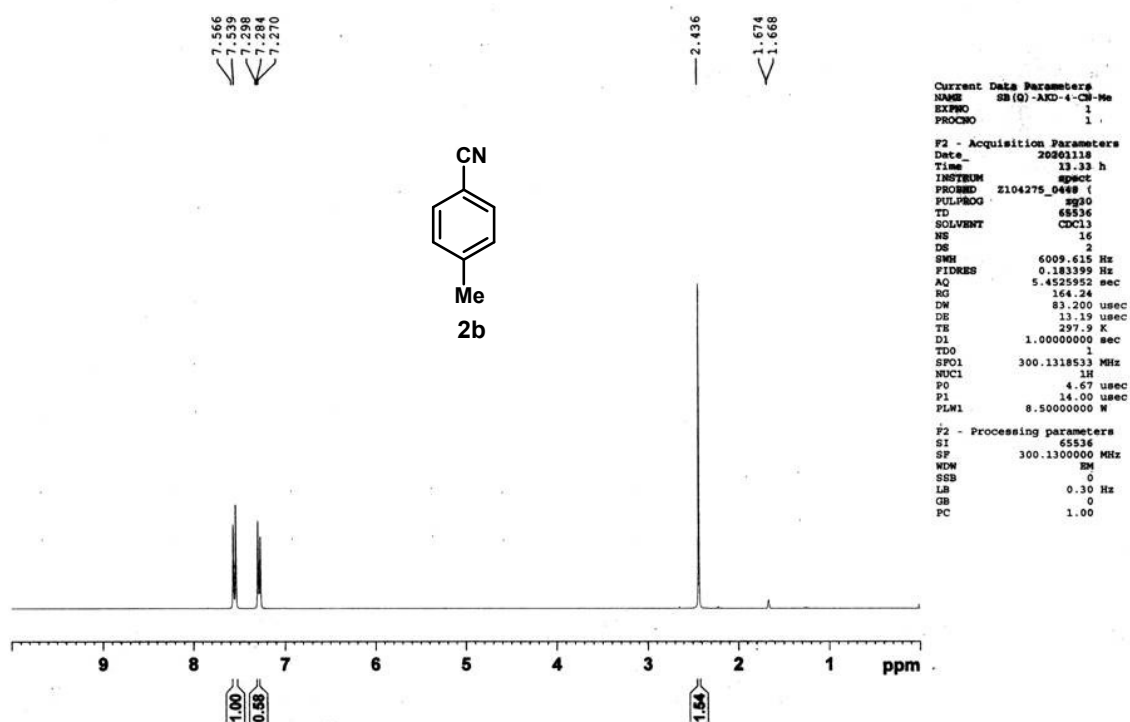

Figure 1 <sup>1</sup>H NMR of 4-tolunitrile (2b)

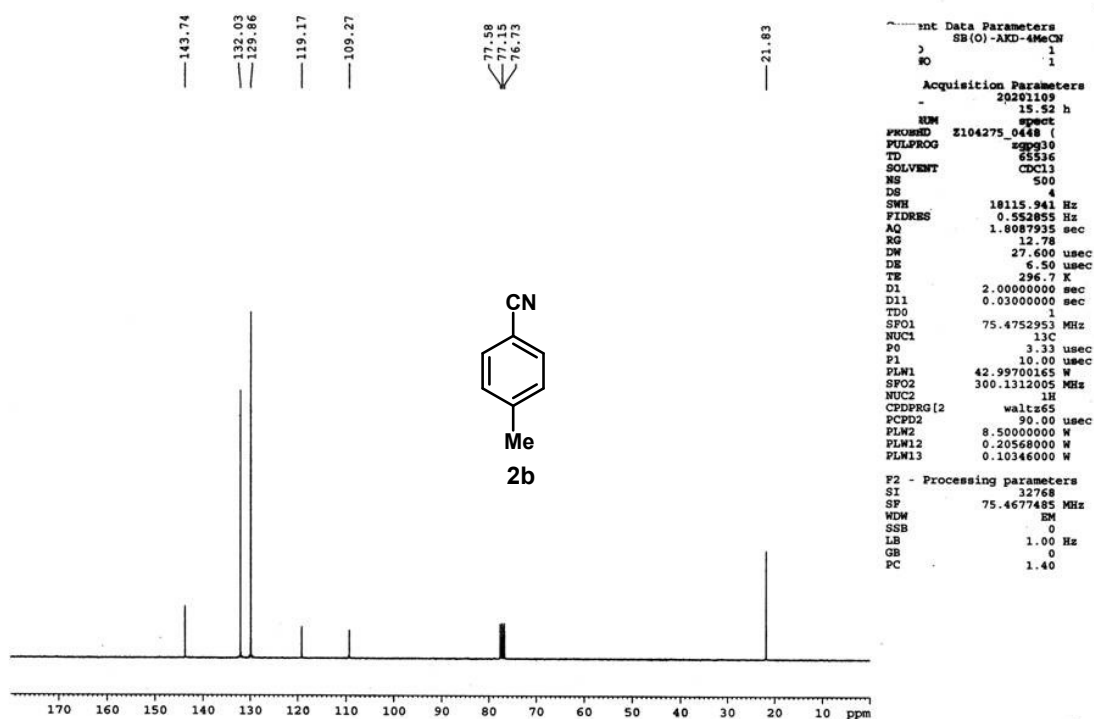

Figure 2 <sup>13</sup>C NMR of 4-tolunitrile (2b)

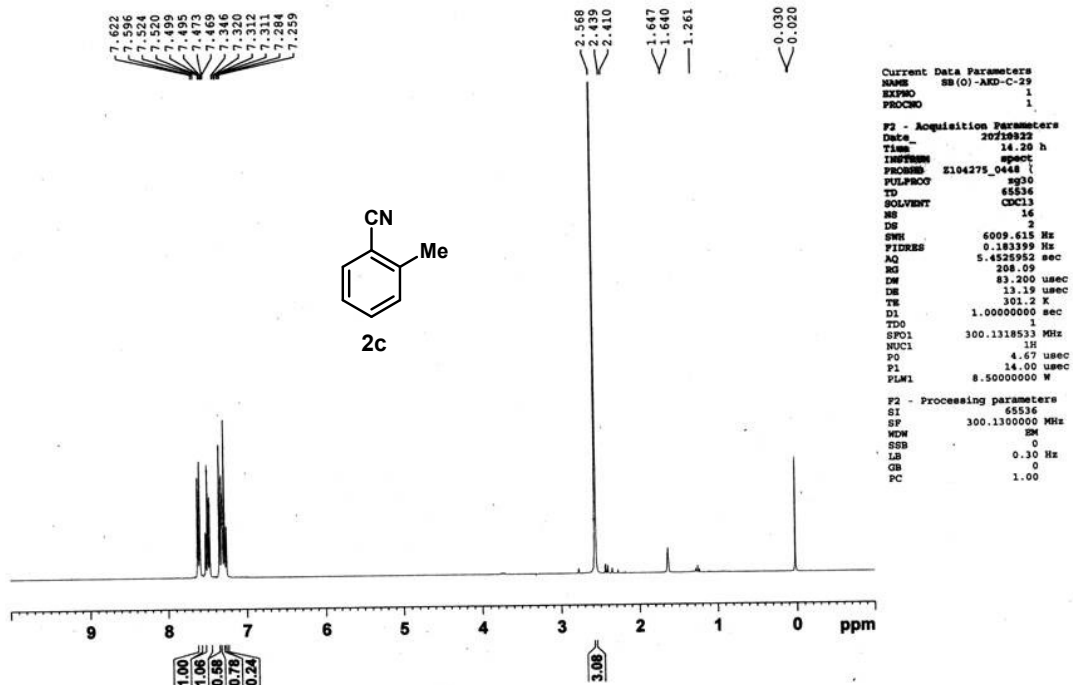

Figure 3  $^1\text{H}$  NMR of 2-tolunitrile (2c)

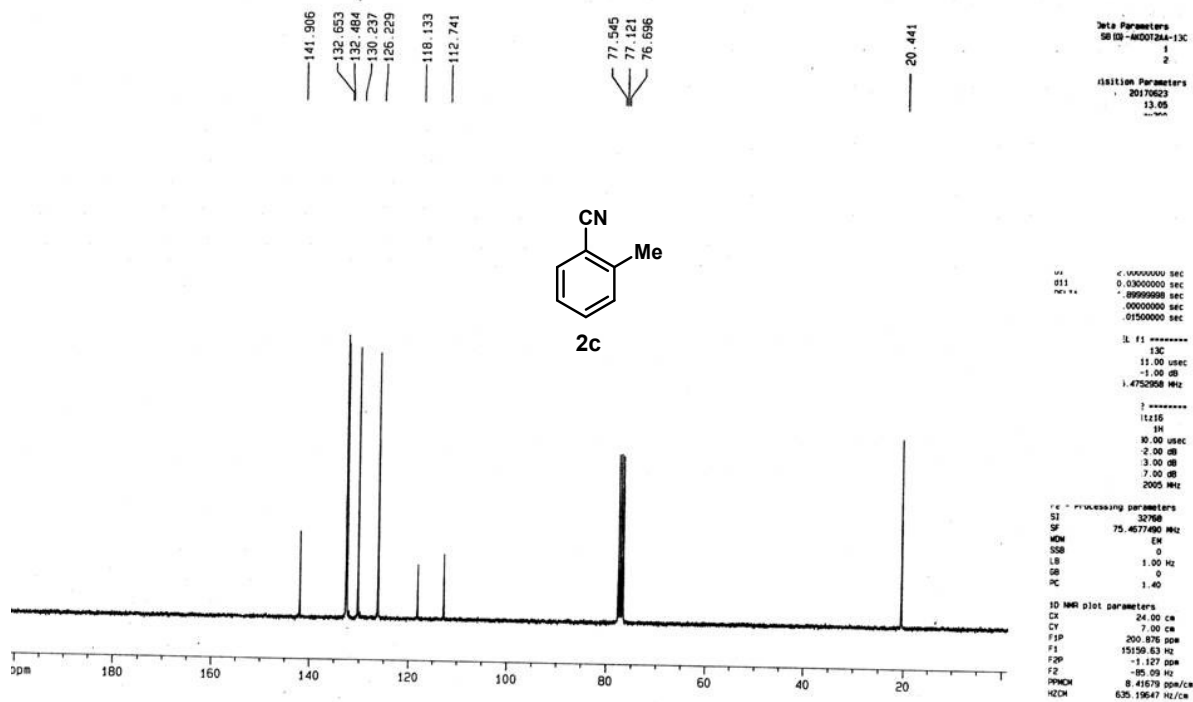

Figure 4  $^{13}\text{C}$  NMR of 2-tolunitrile (2c)

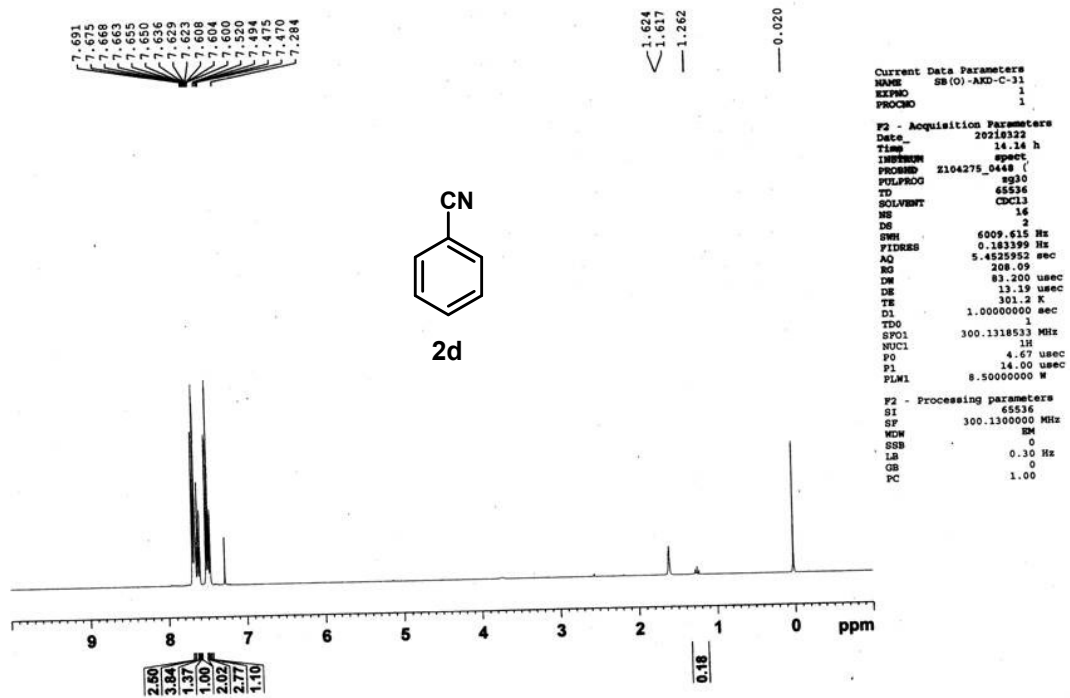

Figure 5 <sup>1</sup>H NMR of Benzonitrile (2d)

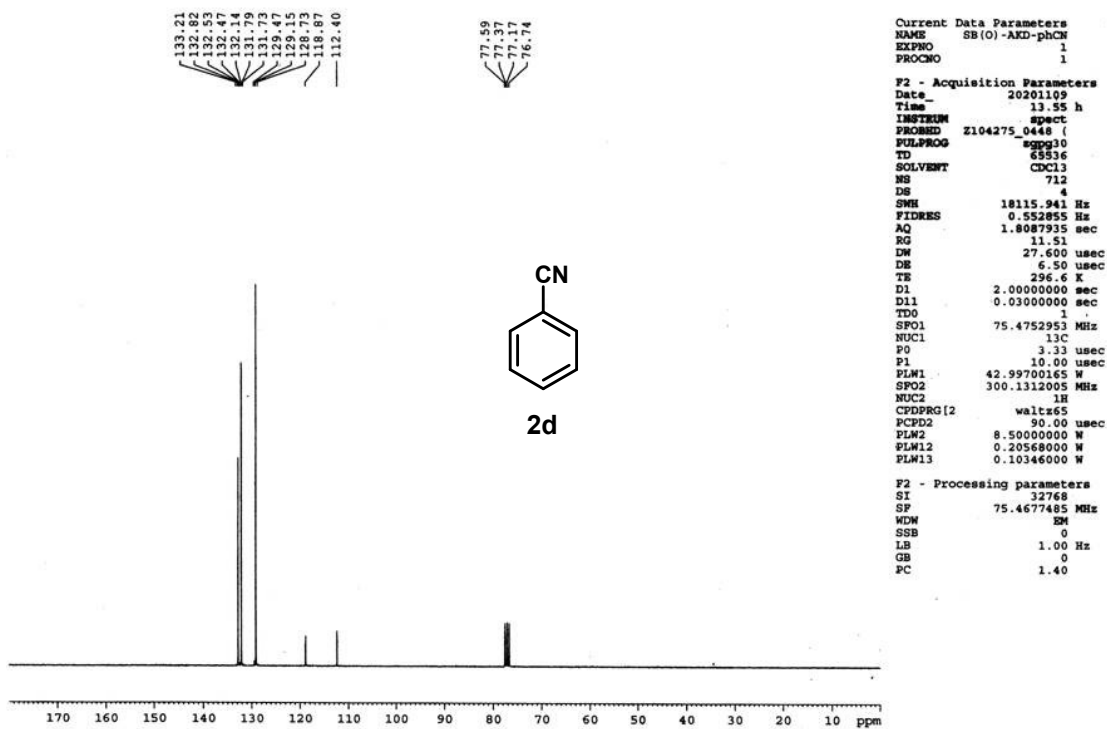

Figure 6 <sup>13</sup>C NMR of Benzonitrile (2d)

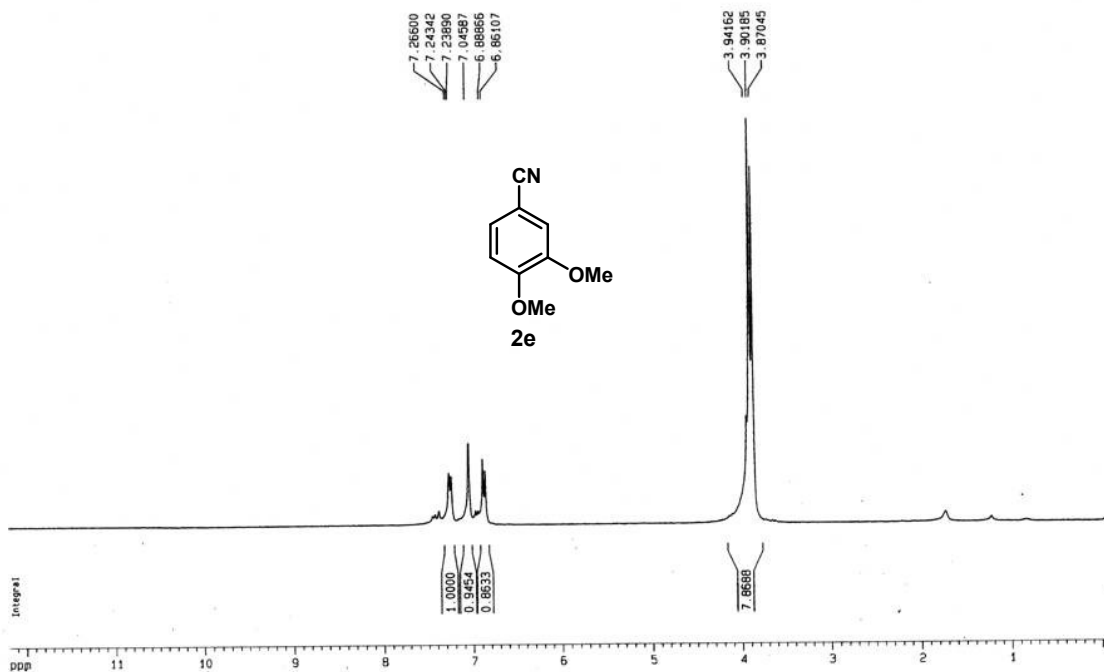

Figure 7  $^1\text{H}$  NMR of 3, 4-dimethoxybenzonitrile (2e)

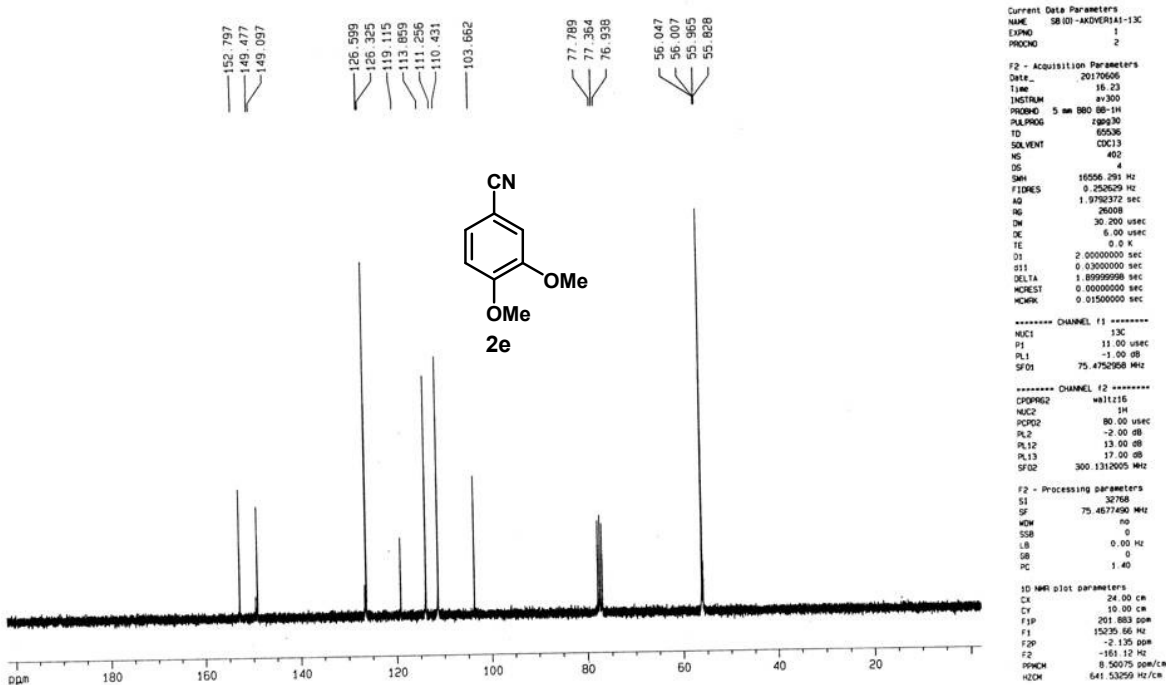

Figure 8  $^{13}\text{C}$  NMR of 3, 4-dimethoxybenzonitrile (2e)

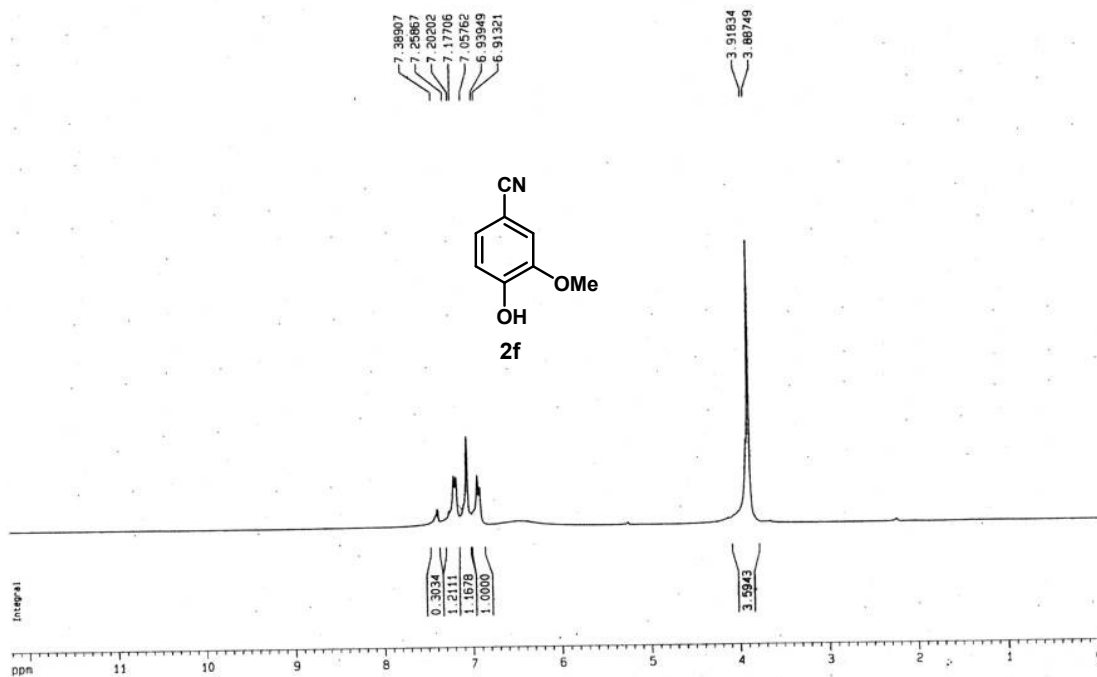

Figure 9  $^1\text{H}$  NMR of 4-hydroxy-3-methoxybenzonitrile (2f)

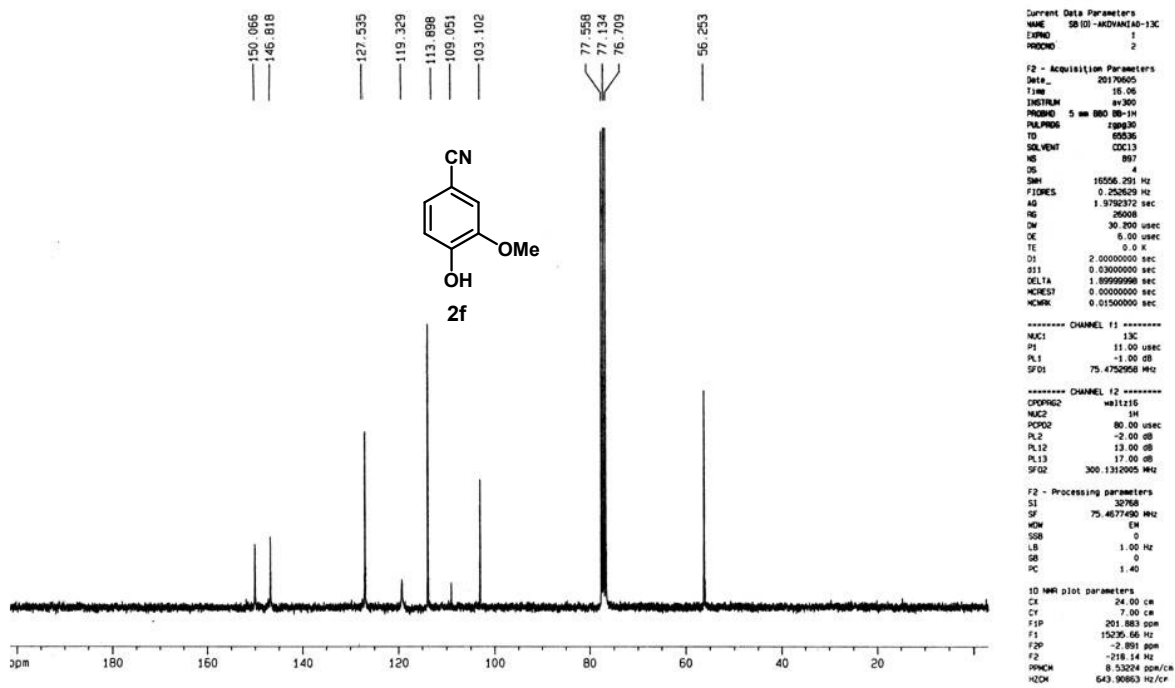

Figure 10  $^{13}\text{C}$  NMR of 4-hydroxy-3-methoxybenzonitrile (2f)

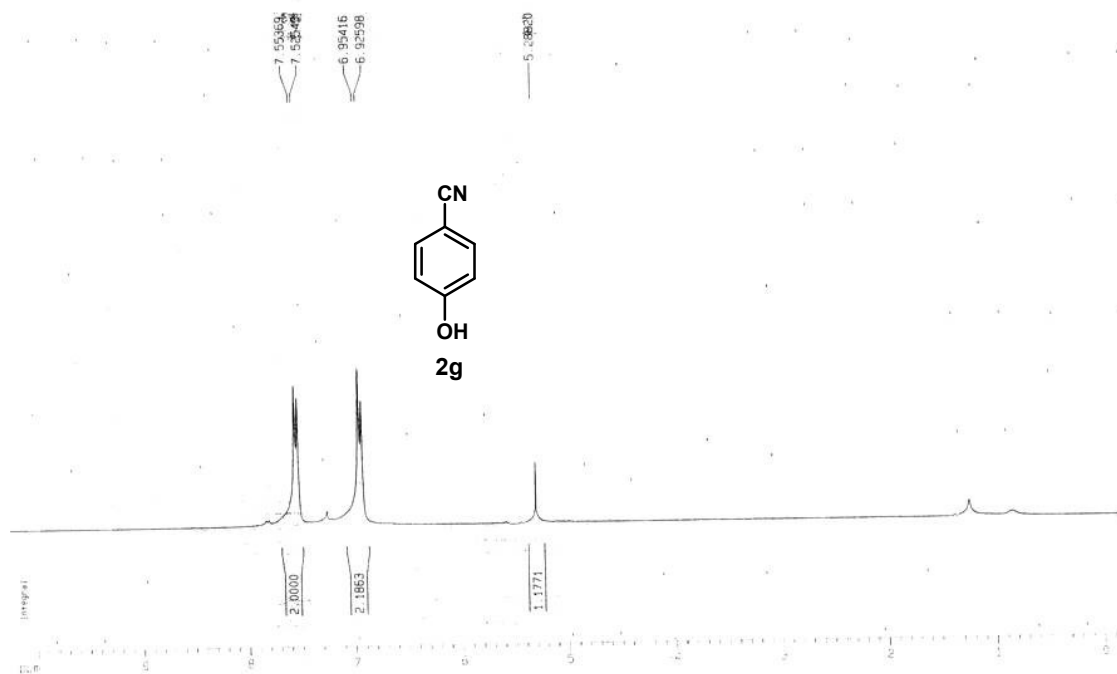

Figure 11 <sup>1</sup>H NMR of 4-hydroxybenzonitrile (2g)

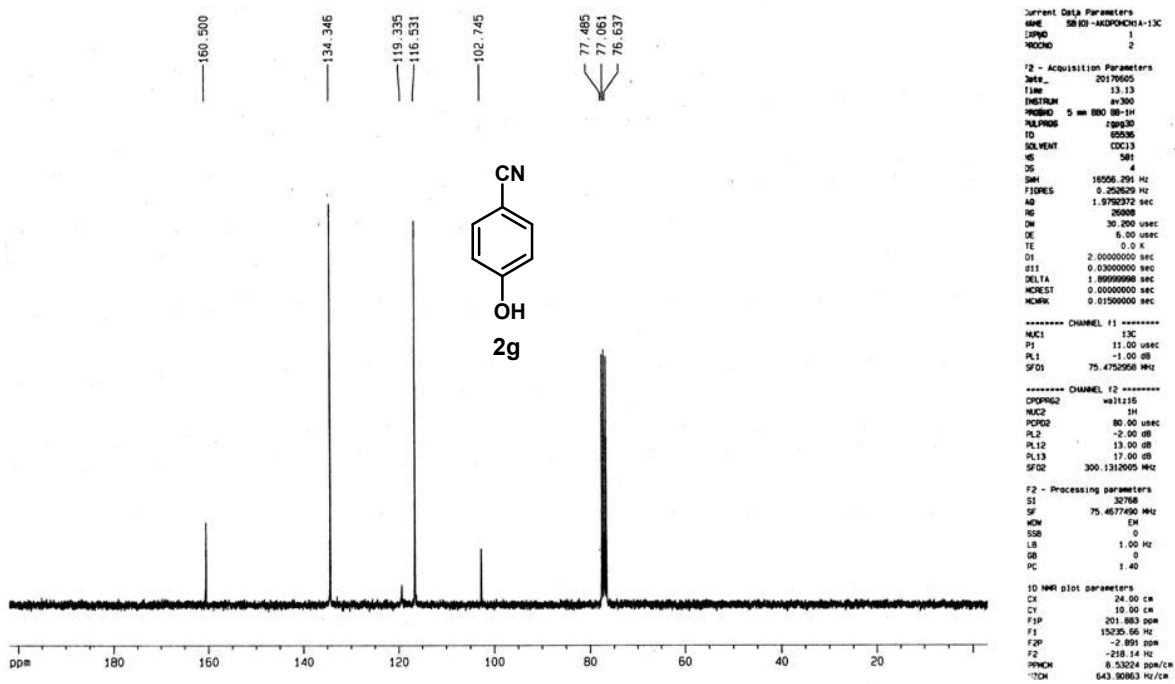

Figure 12 <sup>13</sup>C NMR of 4-hydroxybenzonitrile (2g)

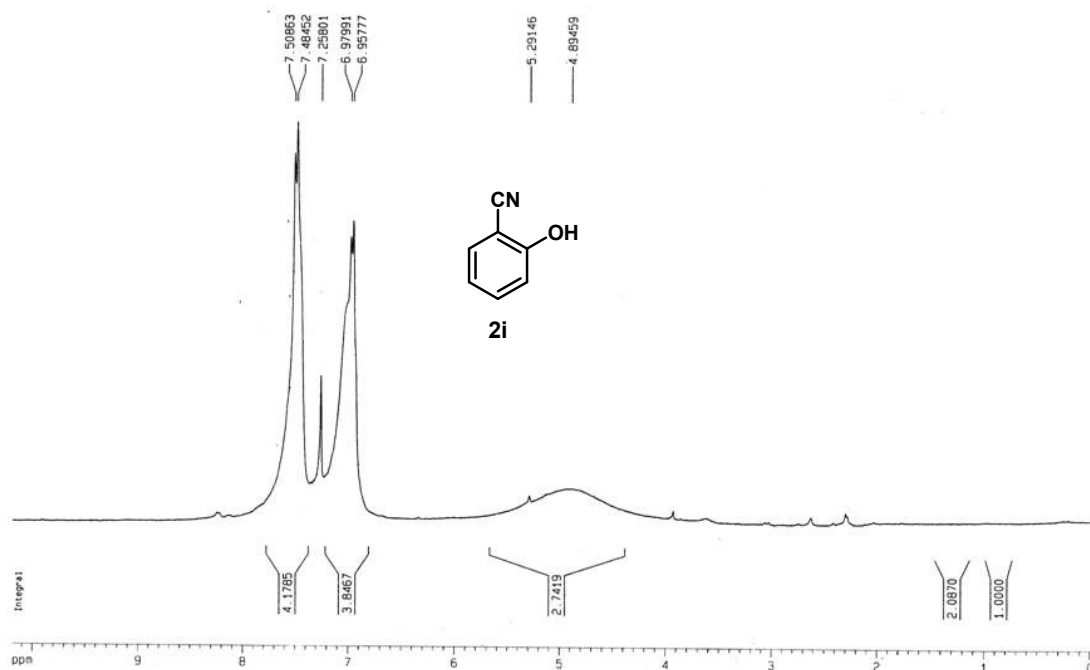

Figure 13  $^1\text{H}$  NMR of 2-hydroxybenzonitrile (2i)

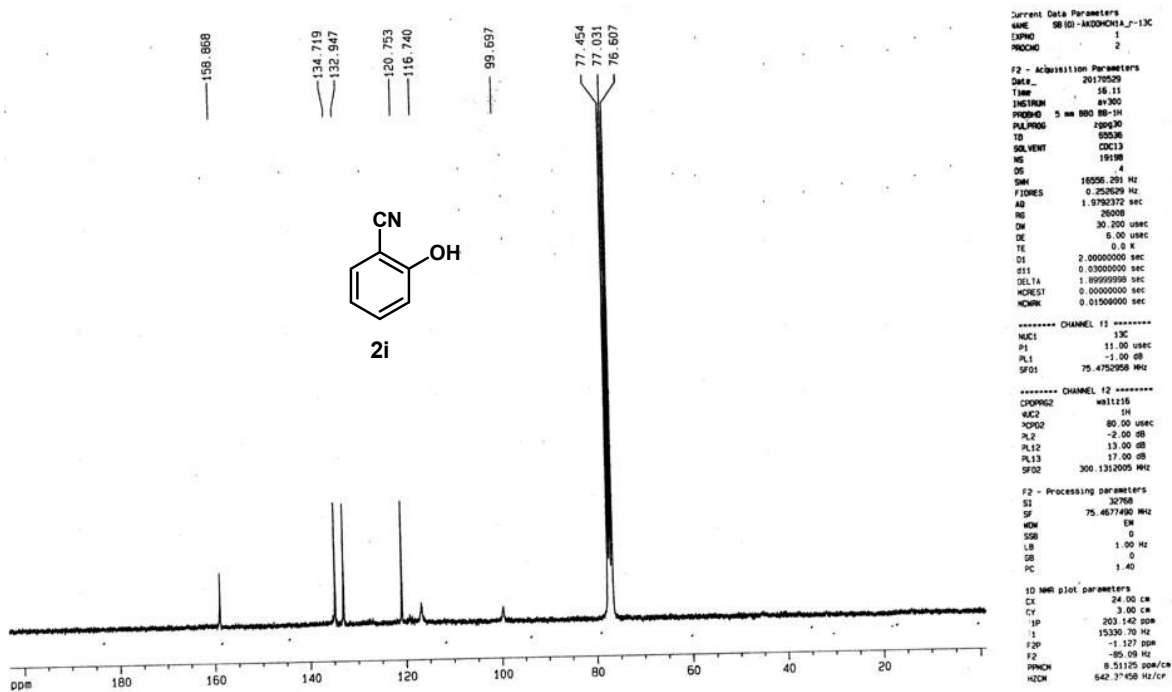

```

Current Data Parameters
NAME 08101-K00001A_1-13C
EXPNO 1
PROCNO 2

F2 - Acquisition Parameters
Date_ 20170209
Time 16.11
INSTRUM mv300
PROBHD 5 mm BBO 1H-1H
PULPROG zgpg30
TD 65536
SOLVENT CDCl3
NS 19188
DS 4
SWH 16556.291 MHz
FIDRES 0.232629 MHz
AQ 1.9792372 sec
RG 26008
DE 30.200 usec
TE 6.00 usec
TD 0.0 K
SI 2.0000000 sec
SFO 0.0300000 sec
DELTA 1.8999999 sec
ACQRES 0.0000000 sec
H2OFR 0.0100000 sec

***** CHANNEL f1 *****
NUC1 13C
P1 11.00 usec
PL1 -1.00 dB
SFO1 75.4752658 MHz

***** CHANNEL f2 *****
CPDPRG2 waltz16
NUC2 1H
P2 80.00 usec
PL2 -2.00 dB
PL12 13.00 dB
PL13 17.00 dB
SFO2 300.1312005 MHz

F2 - Processing parameters
SI 32768
SF 75.467499 MHz
WDW EM
SSB 0
LB 1.00 Hz
GB 0
PC 1.40

1D NMR plot parameters
CX 24.00 cm
CY 3.00 cm
FID 203.142 ppm
I 15330.70 Hz
F2P -1.127 ppm
F2 -65.00 Hz
PPMCH 8.51125 ppm/cm
H2CM 842.37458 Hz/cr
  
```

Figure 14  $^{13}\text{C}$  NMR of 2-hydroxybenzonitrile (2i)





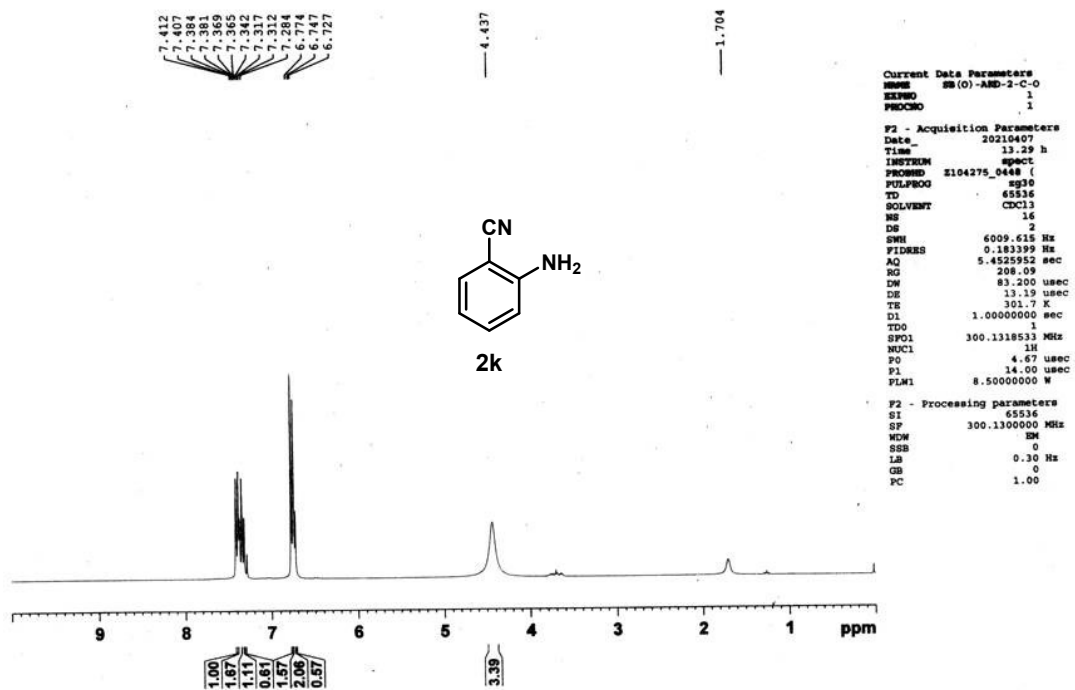

Figure 17 <sup>1</sup>H NMR of 2-aminobenzonitrile (2k)

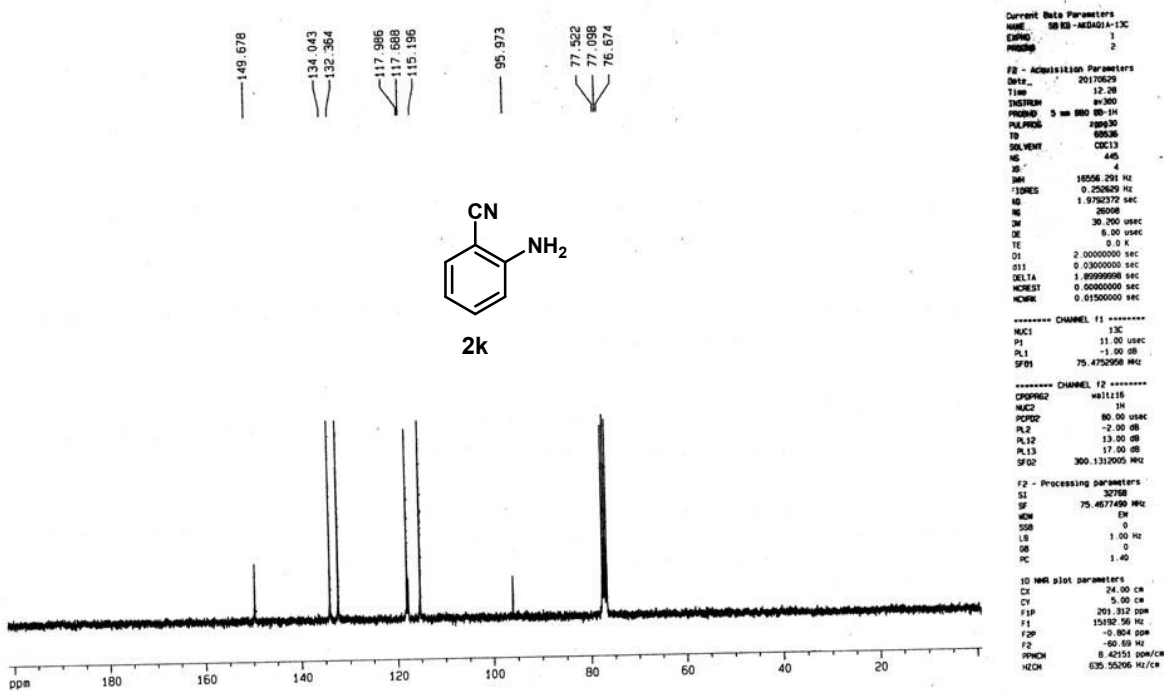

Figure 18 <sup>13</sup>C NMR of 2-aminobenzonitrile (2k)

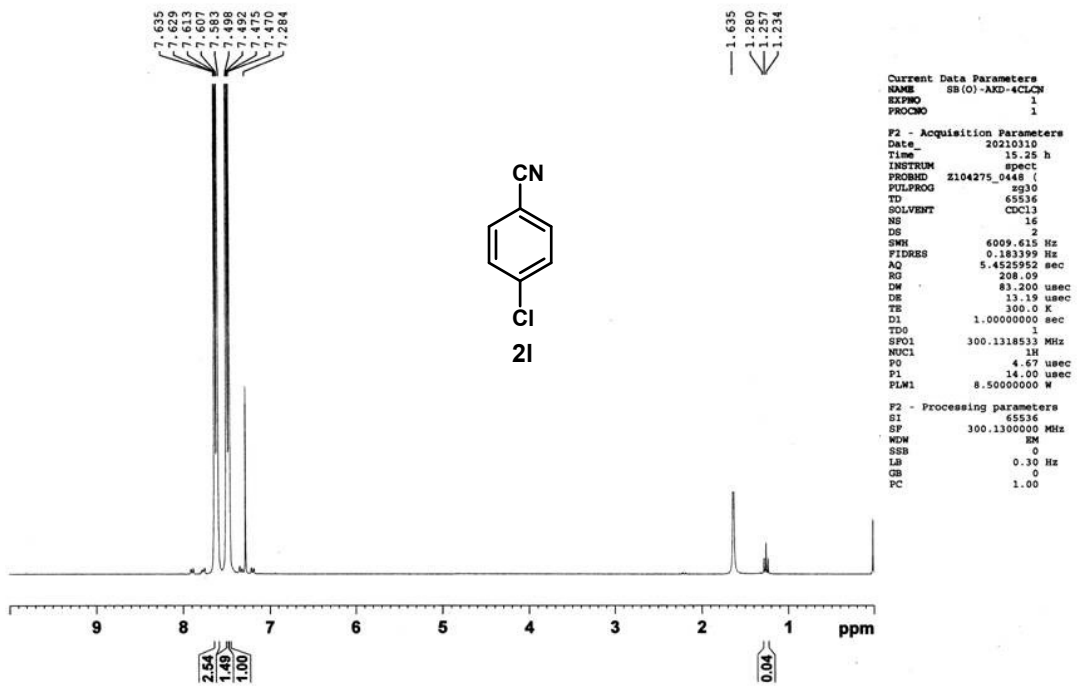

Figure 19 <sup>1</sup>H NMR of 4-chlorobenzonitrile (21)

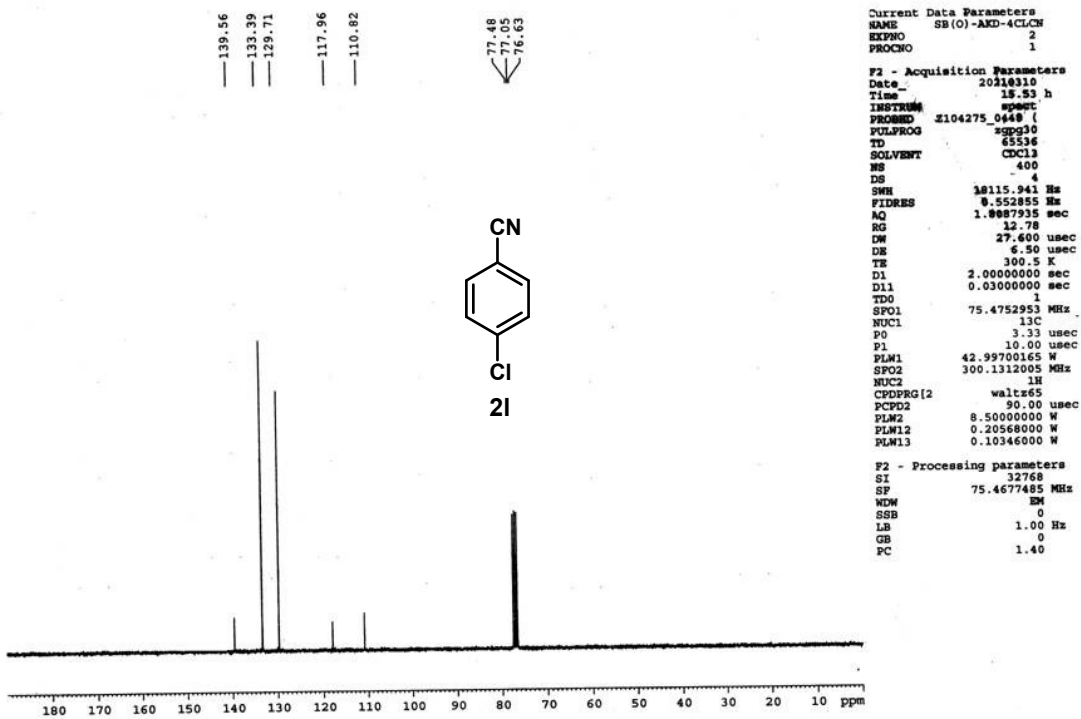

Figure 20 <sup>13</sup>C NMR of 4-chlorobenzonitrile (21)

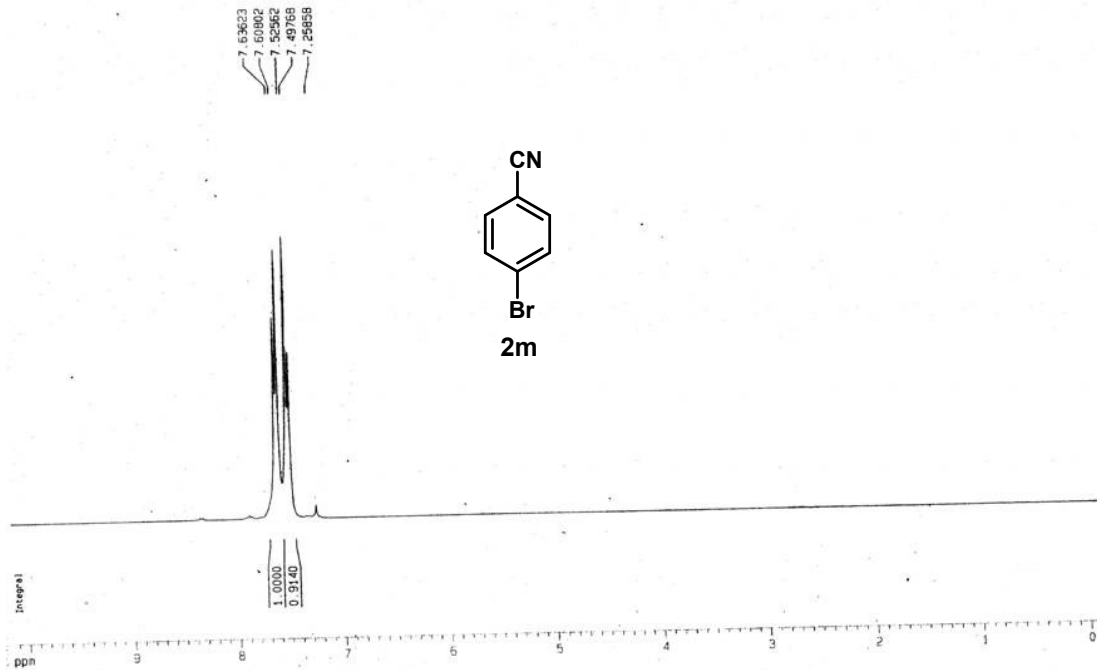

Figure 21 <sup>1</sup>H NMR of 4-bromobenzonitrile (2m)

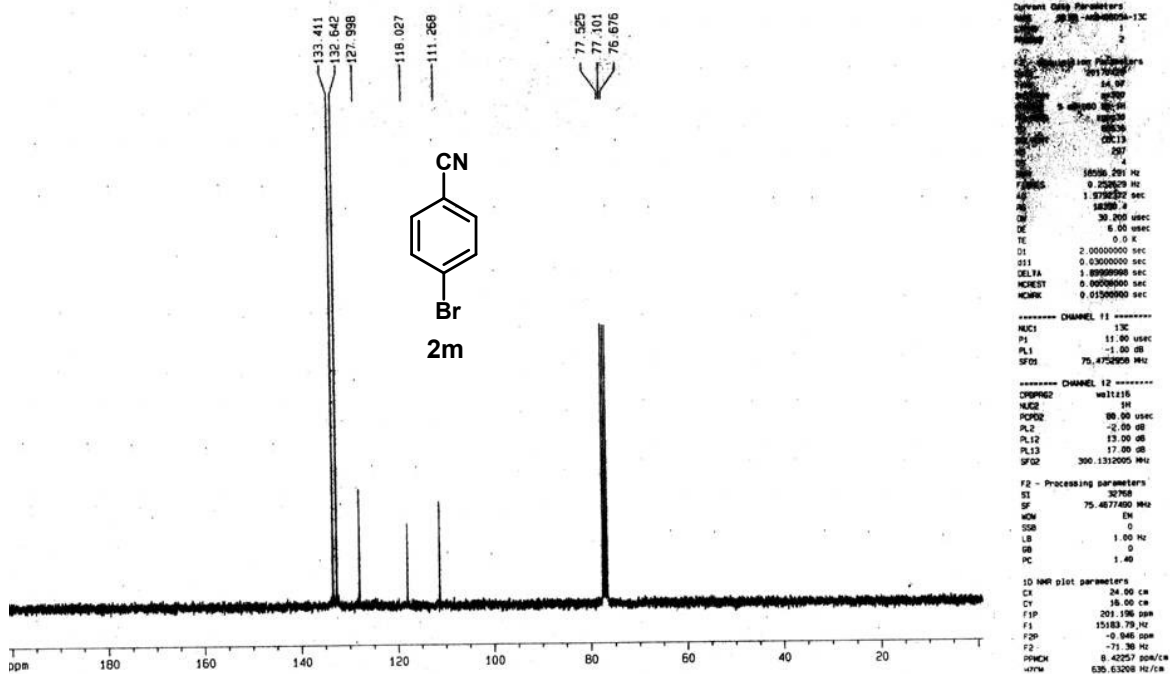

Figure 22 <sup>13</sup>C NMR of 4-bromobenzonitrile (2m)

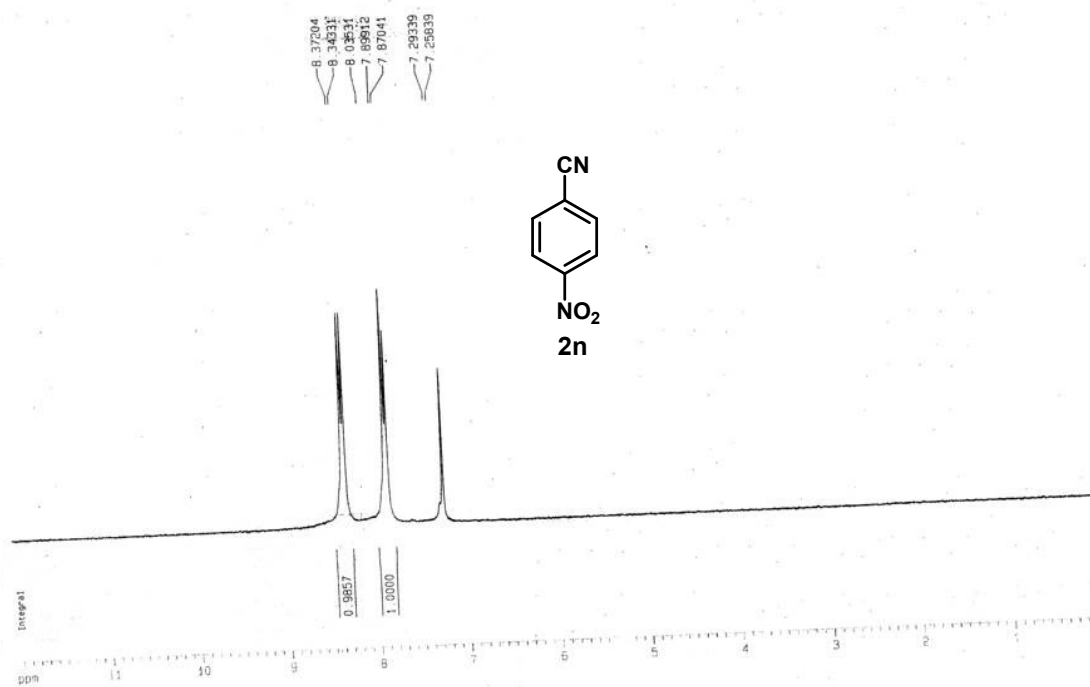

Figure 23 <sup>1</sup>H NMR of 4-nitrobenzonitrile (2n)

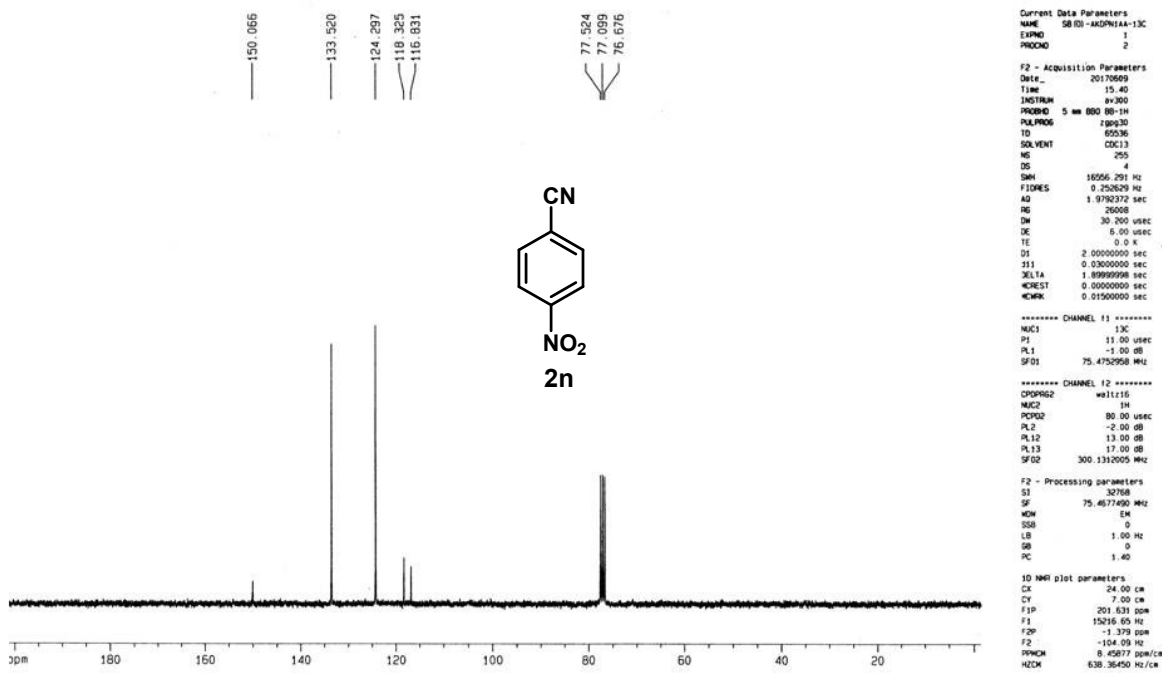

```

Current Data Parameters
NAME 58101-AC09144-13C
EXPNO 1
PROCNO 2

F2 - Acquisition Parameters
Date_ 20170609
Time 15.40
INSTRUM srt300
PROBHD 5 mm BBO 1H
PULPROG zgpg30
TD 65536
SOLVENT CDCl3
NS 255
DS 4
SFO1 16256.291 MHz
FIDRES 0.262629 MHz
AQ 1.9792372 sec
RG 26008
DE 30.200 usec
TE 300.2 K
D1 2.0000000 sec
S1 0.0300000 sec
XEL1A 1.89999998 sec
KDELTA 0.0000000 sec
KMR 0.01500000 sec

***** CHANNEL f1 *****
NUC1 13C
P1 11.00 usec
PL1 -1.00 dB
SFO1 75.4752958 MHz

***** CHANNEL f2 *****
CPDPRG2 waltz16
NUC2 1H
PCPD2 80.00 usec
PL2 -2.00 dB
PL12 13.00 dB
PL13 17.00 dB
SFO2 300.131005 MHz

F2 - Processing parameters
SI 32768
SF 75.4677490 MHz
WDW EM
SSB 0
LB 1.00 Hz
GB 0
PC 1.40

1D NMR plot parameters
CX 24.00 cm
CY 7.00 cm
F1P 201.63100 MHz
F1 15218.60 Hz
F2P -1.379 ppm
F2 -104.09 Hz
FREQ 6.45877 ppm/cm
HZCM 638.36450 Hz/cm
  
```

Figure 24 <sup>13</sup>C NMR of 4-nitrobenzonitrile (2n)

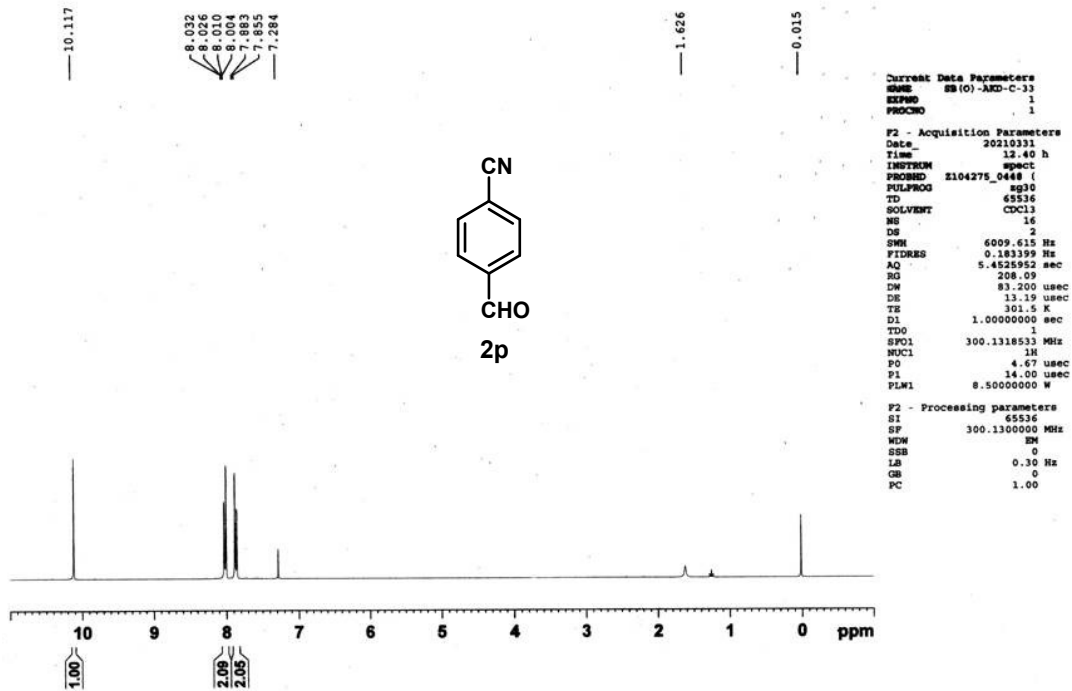

Figure 25 <sup>1</sup>H NMR of 4-formylbenzonitrile (2p)

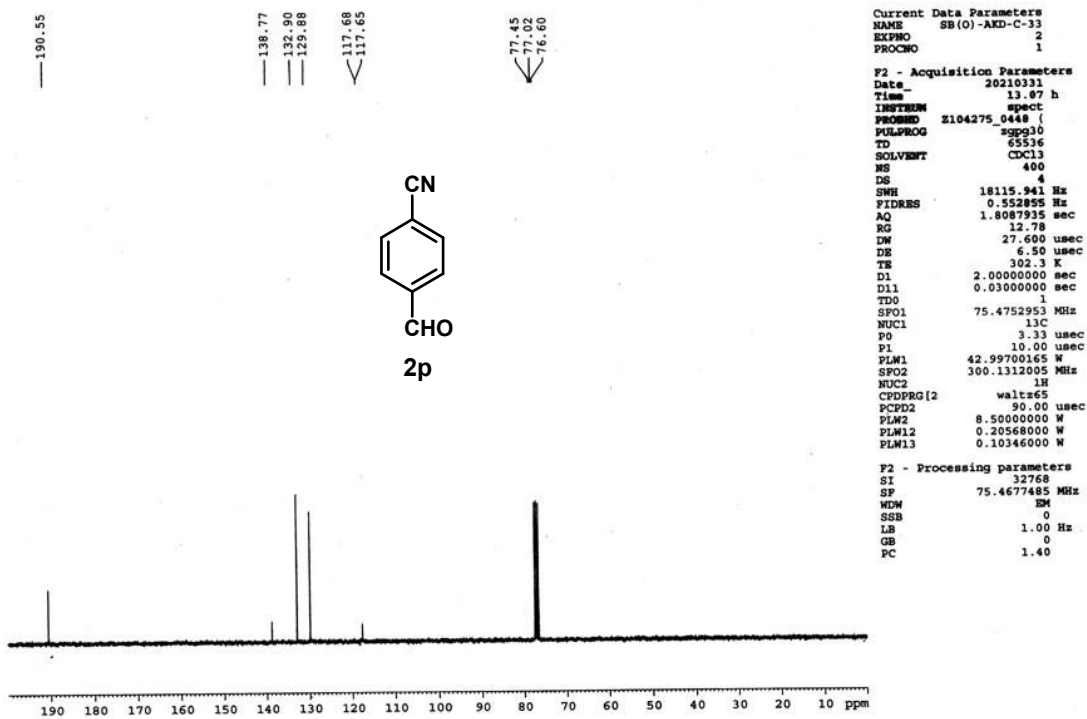

Figure 26 <sup>13</sup>C NMR of 4-formylbenzonitrile (2p)

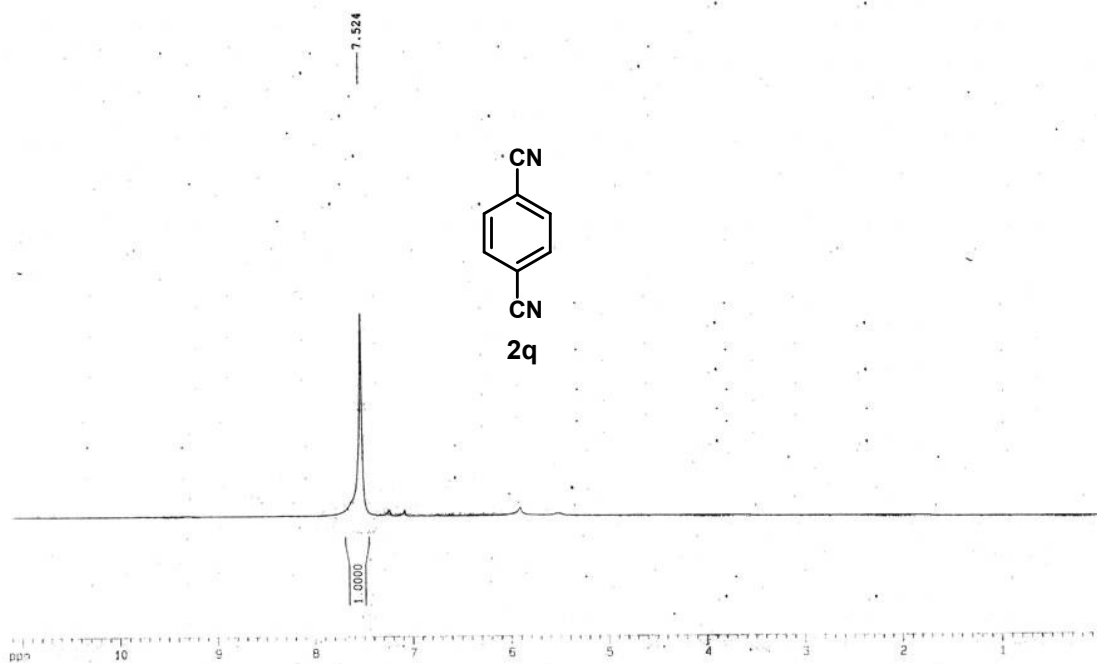

Figure 27 <sup>1</sup>H NMR of Terephthalonitrile (2q)

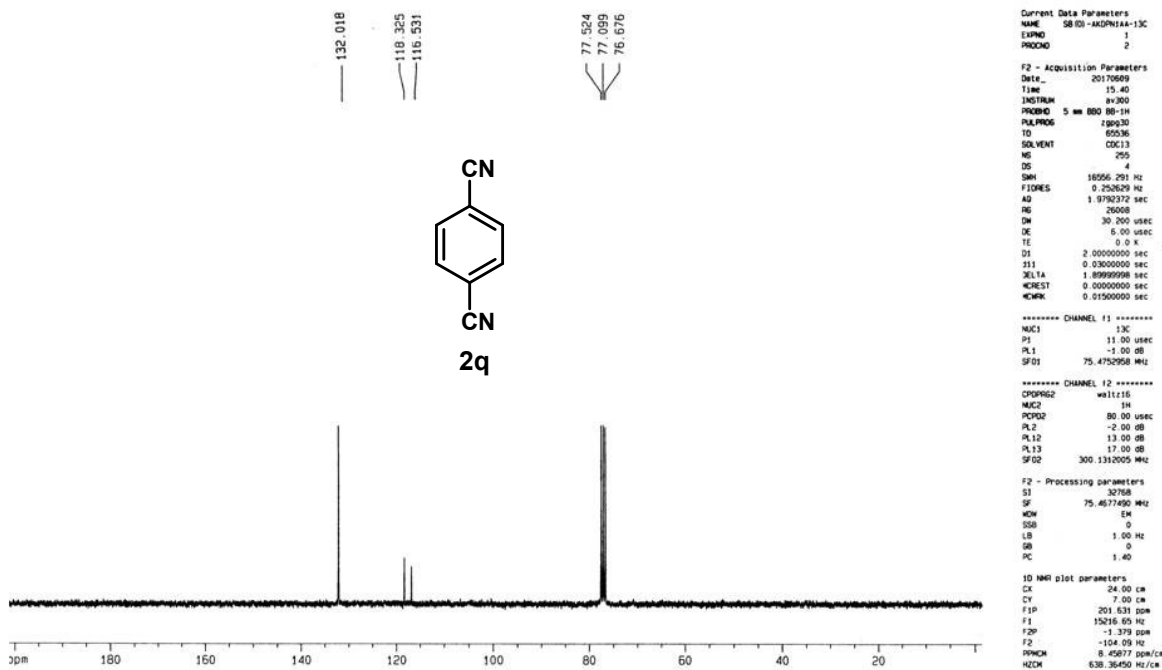

Figure 28 <sup>13</sup>C NMR of Terephthalonitrile (2q)

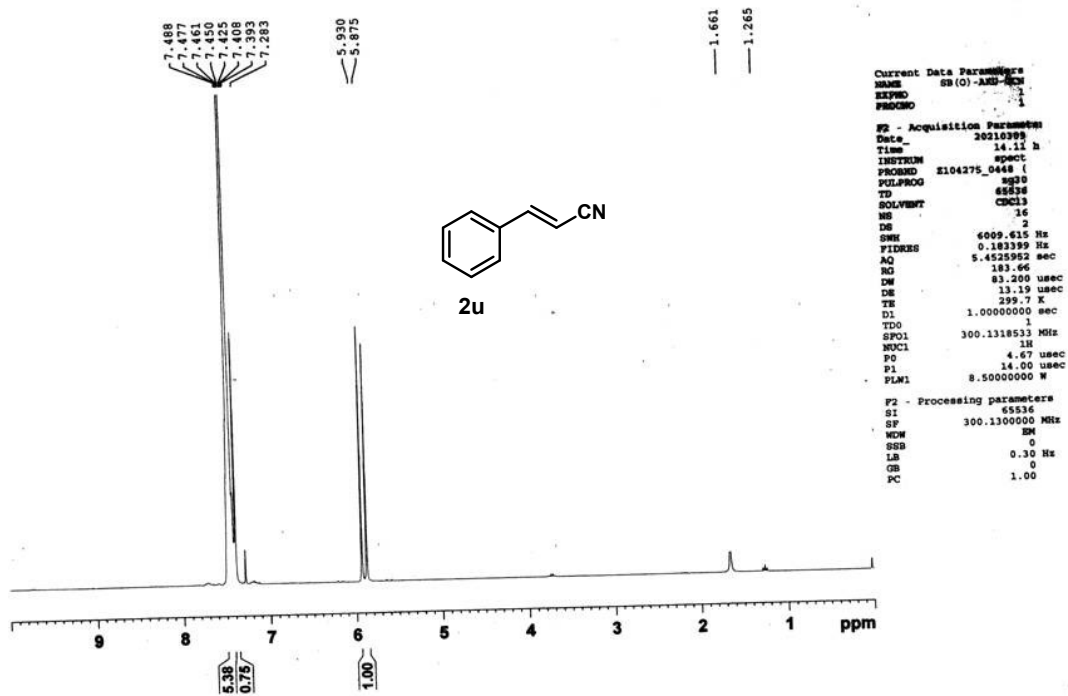

Figure 29 <sup>1</sup>H NMR of Cinnamitrile (2u)

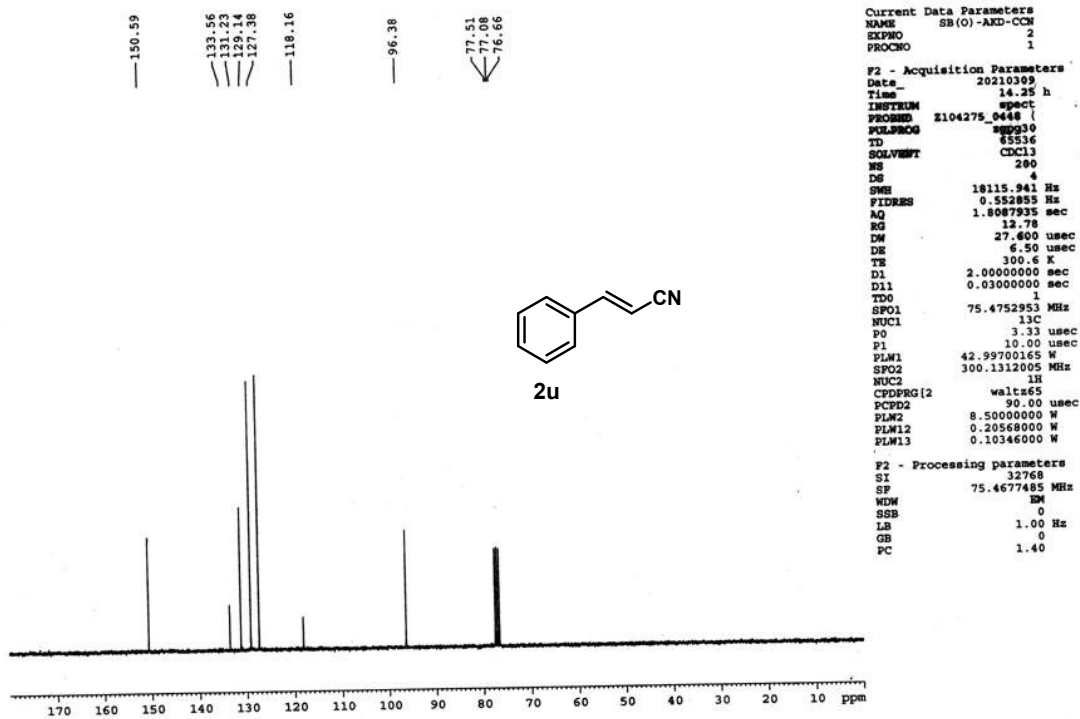

Figure 30 <sup>13</sup>C NMR of Cinnamitrile (2u)

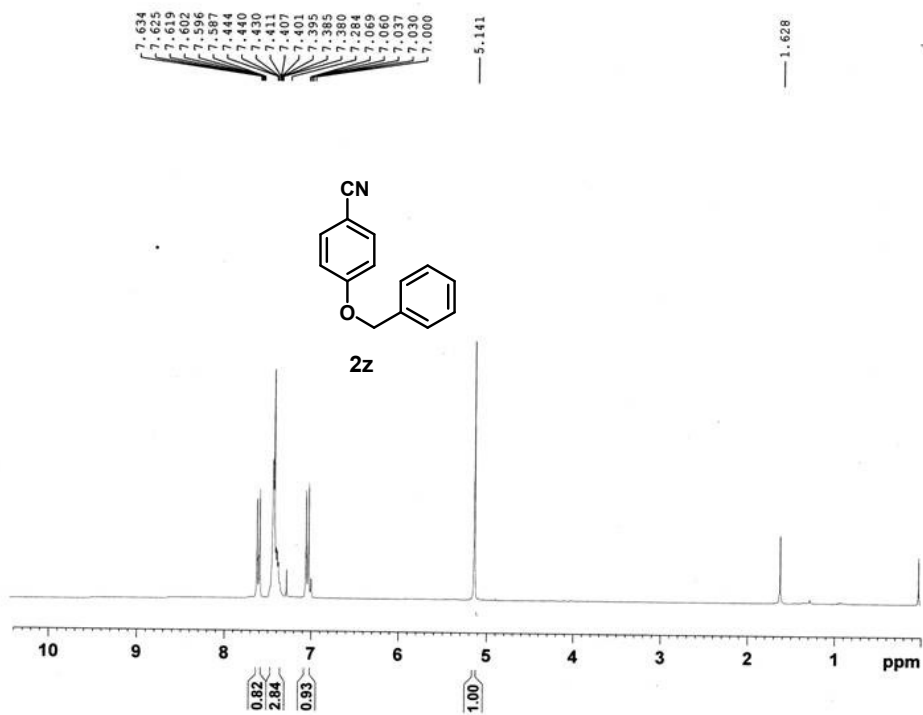

Figure 31 <sup>1</sup>H NMR of 4-(benzyloxy)benzonitrile (2z)

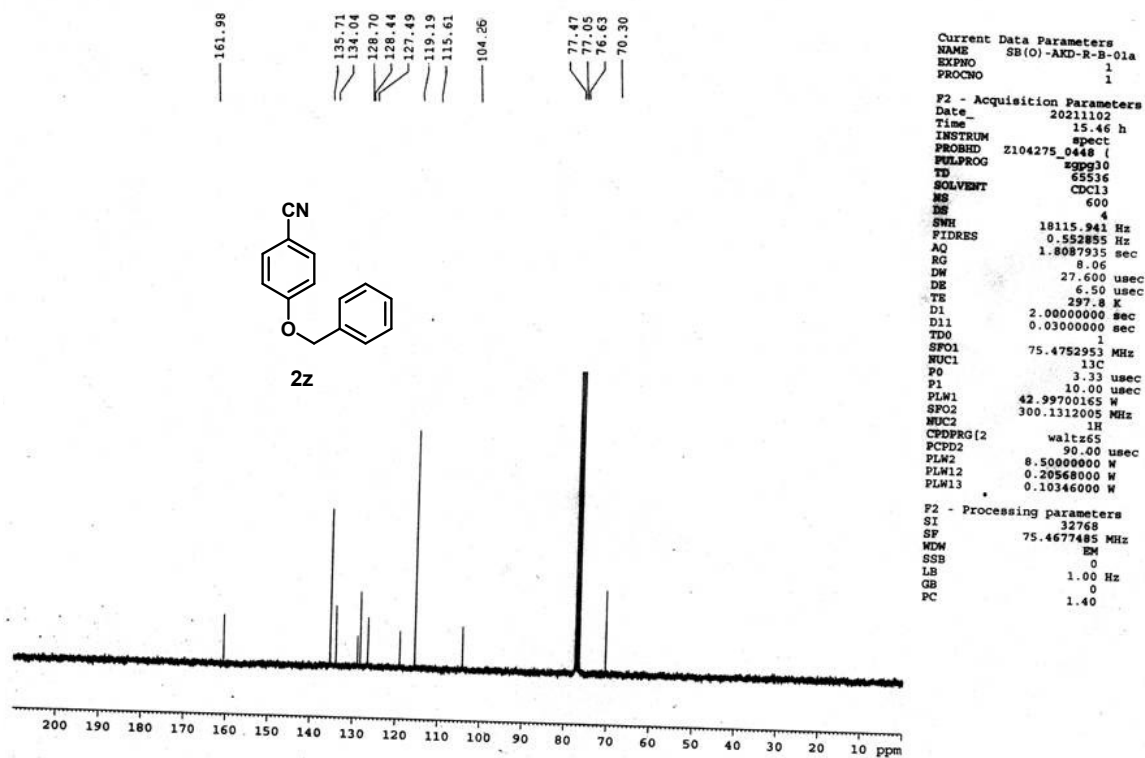

Figure 32 <sup>13</sup>C NMR of 4-(benzyloxy)benzonitrile (2z)



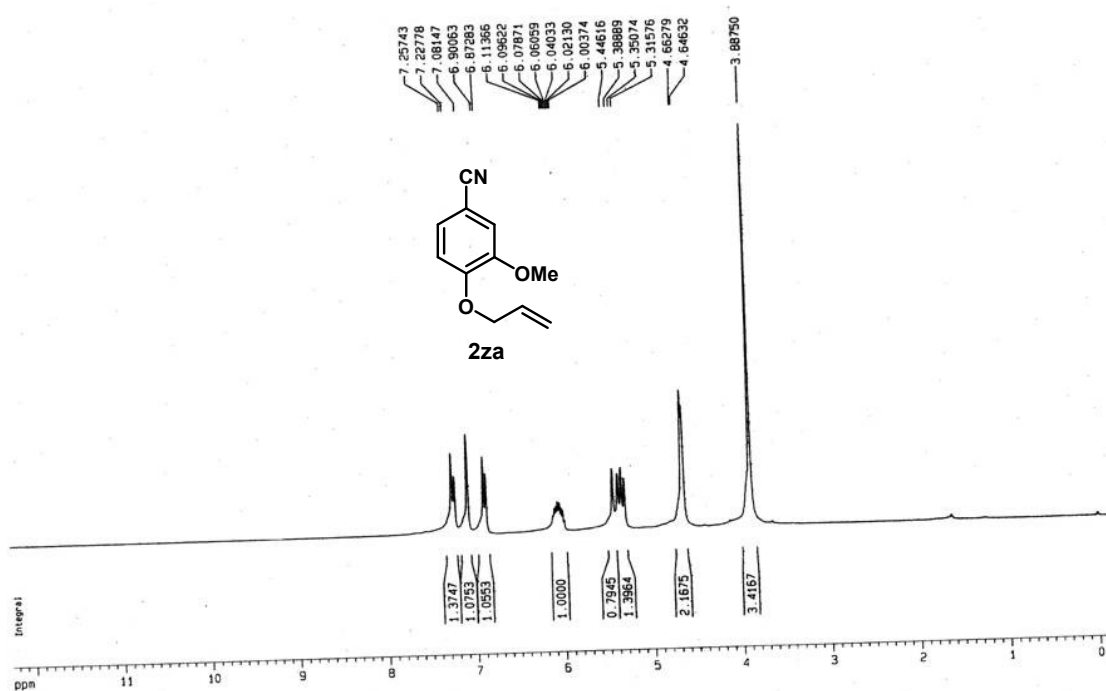

Figure 33  $^1\text{H}$  NMR of 4-(allyloxy)-3-methoxybenzonitrile (2za)

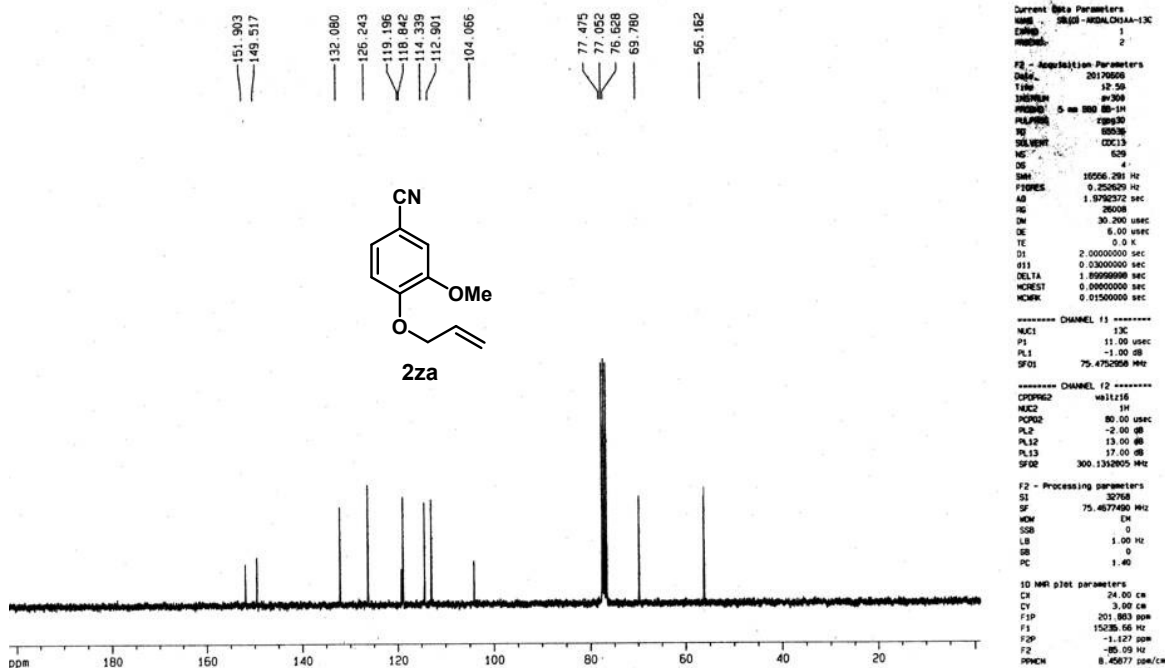

Figure 34  $^{13}\text{C}$  NMR of 4-(allyloxy)-3-methoxybenzonitrile (2za)

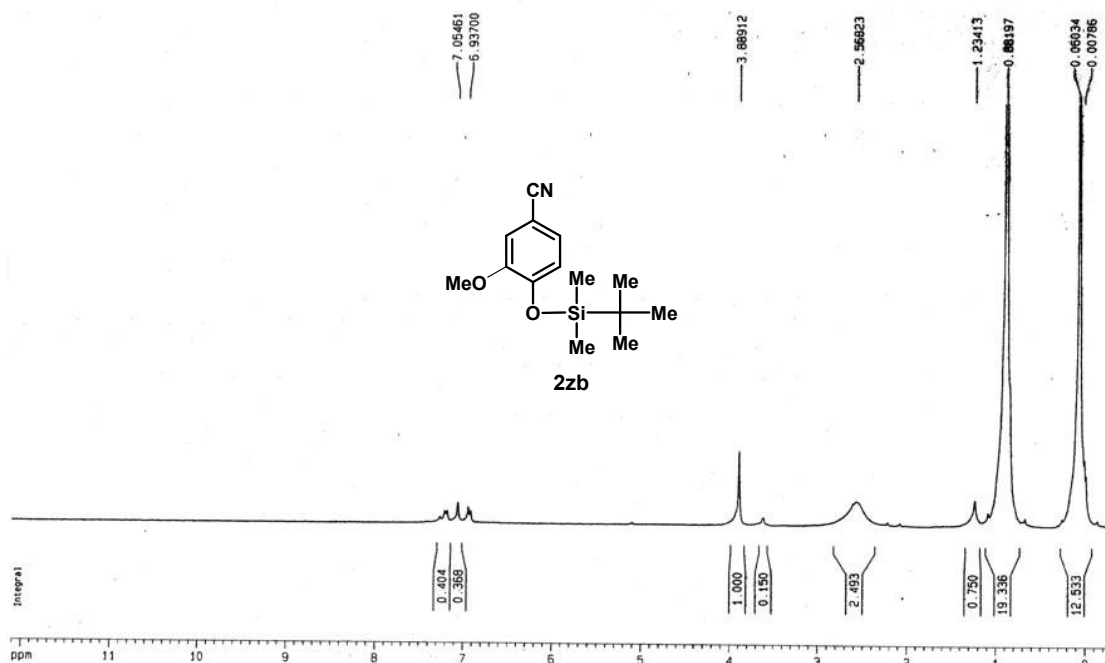

Figure 35  $^1\text{H}$  NMR of 4-((tert-butyl dimethylsilyl)oxy)-3-methoxybenzonitrile (2zb)

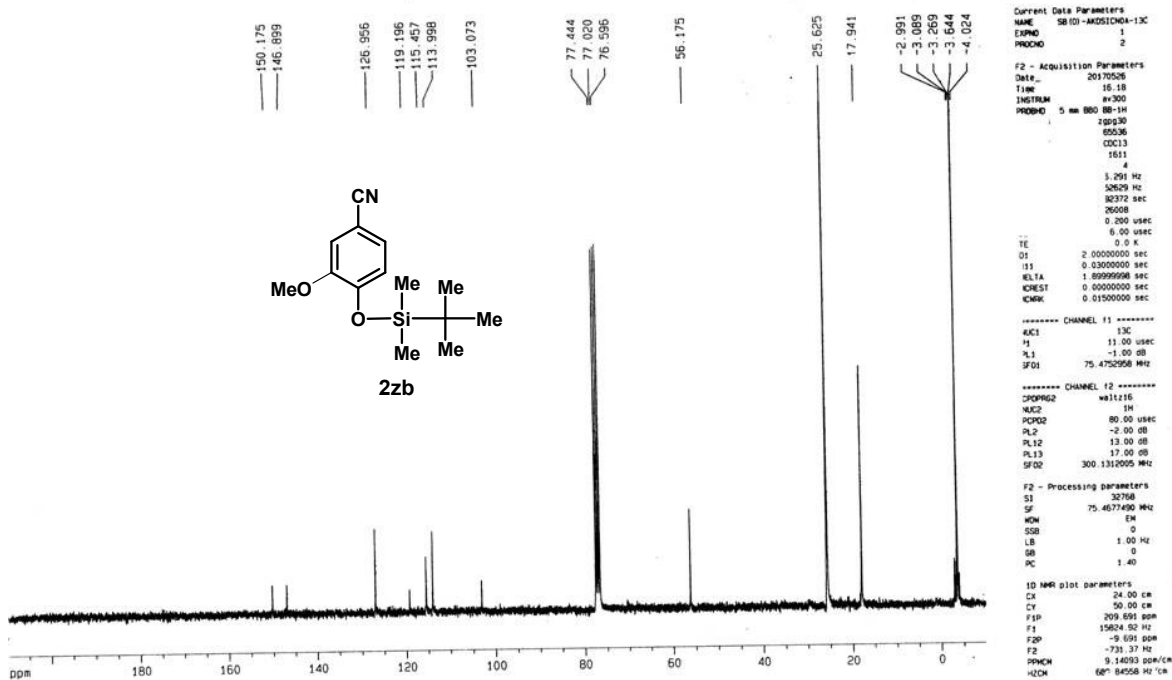

Figure 36  $^{13}\text{C}$  NMR of 4-((tert-butyl dimethylsilyl)oxy)-3-methoxybenzonitrile (2zb)

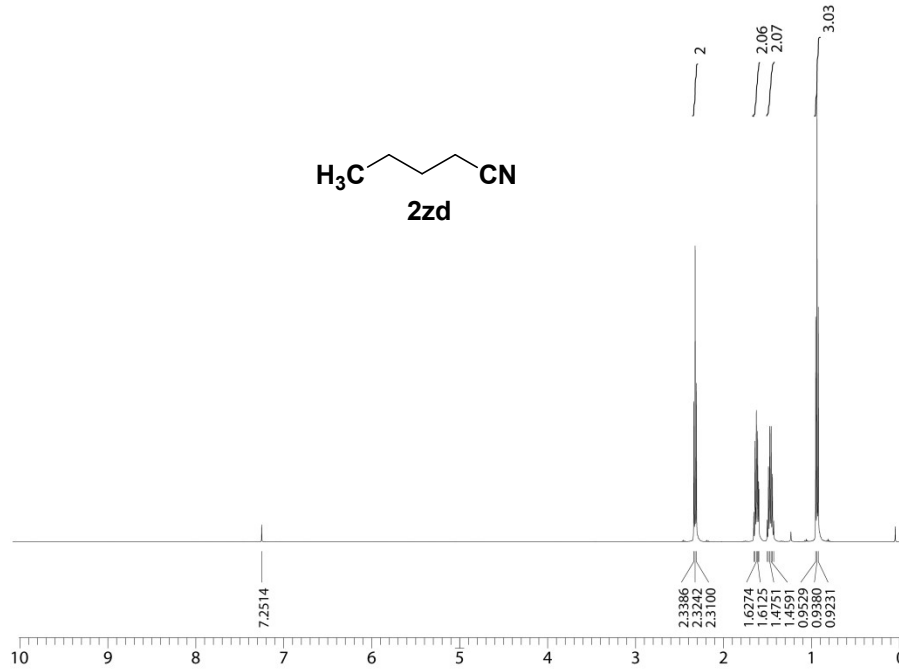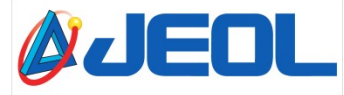

Filename = MMAKV1\_PROTON-3.jdf  
 Author = RAJA BABU  
 Experiment = single\_pulse.ex2  
 Sample\_id = MMAKV1  
 Solvent = CHLOROFORM-D  
 Creation\_time = 6-NOV-2021 10:02:56  
 Revision\_time = 7-NOV-2021 22:13:50  
 Current\_time = 7-NOV-2021 22:16:01

Data\_format = 1D COMPLEX  
 Dim\_size = 13107  
 Dim\_title = 1H  
 Dim\_units = [ppm]  
 Dimensions = X  
 Site = ECX 500  
 Spectrometer = DELTA2\_NMR

Field\_strength = 11.7473579[T] (500[MH]  
 X\_acq\_duration = 1.74587904[s]  
 X\_domain = 1H  
 X\_freq = 500.15991521[MHz]  
 X\_offset = 5.0[ppm]  
 X\_points = 16384  
 X\_prescans = 1  
 X\_resolution = 0.57277737[Hz]  
 X\_sweep = 9.38438438[kHz]  
 Irr\_domain = 1H  
 Irr\_freq = 500.15991521[MHz]  
 Irr\_offset = 5.0[ppm]  
 Tri\_domain = 1H  
 Tri\_freq = 500.15991521[MHz]  
 Tri\_offset = 5.0[ppm]  
 Clipped = FALSE  
 Mod\_return = 1  
 Scans = 16  
 Total\_scans = 16

X\_90\_width = 15.75[us]  
 X\_acq\_time = 1.74587904[s]  
 X\_angle = 45[deg]  
 X\_atn = 3.99[dB]  
 X\_pulse = 7.875[us]  
 Irr\_mode = Off  
 Tri\_mode = Off  
 Dante\_preset = FALSE  
 Initial\_wait = 1[s]  
 Recvr\_gain = 42  
 Relaxation\_delay = 1[s]  
 Repetition\_time = 2.74587904[s]  
 Temp\_get = 396.6[dC]

Figure 37 <sup>1</sup>H NMR of Pentanenitrile (2zd)

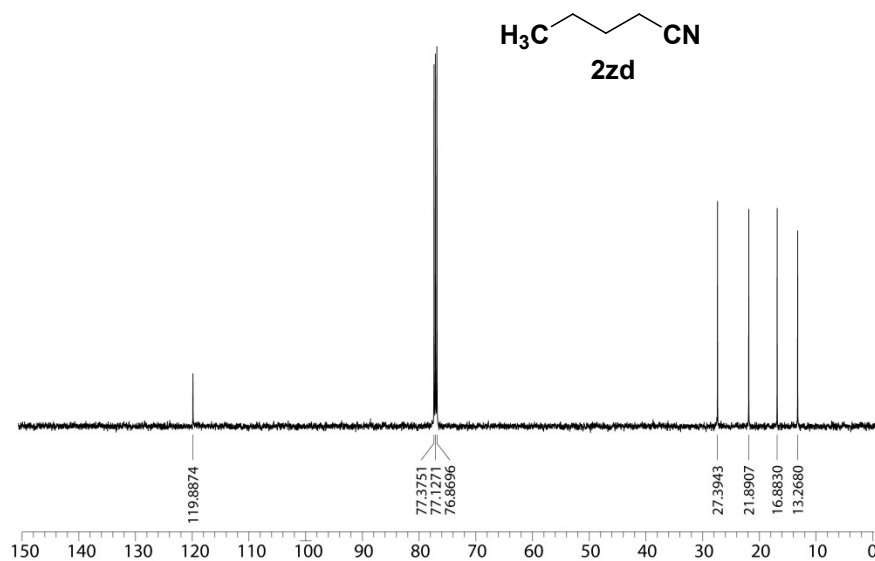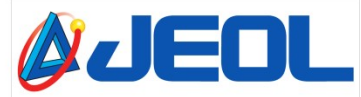

Filename = MMAKV1\_CARBON-3.jdf  
 Author = RAJA BABU  
 Experiment = single\_pulse\_dec  
 Sample\_id = MMAKV1  
 Solvent = CHLOROFORM-D  
 Creation\_time = 7-NOV-2021 06:11:02  
 Revision\_time = 7-NOV-2021 23:11:47  
 Current\_time = 7-NOV-2021 23:12:38

Data\_format = 1D COMPLEX  
 Dim\_size = 26214  
 Dim\_title = 13C  
 Dim\_units = [ppm]  
 Dimensions = X  
 Site = ECX 500  
 Spectrometer = DELTA2\_NMR

Field\_strength = 11.7473579[T] (500[MH]  
 X\_acq\_duration = 0.83361792[s]  
 X\_domain = 13C  
 X\_freq = 125.76529768[MHz]  
 X\_offset = 100[ppm]  
 X\_points = 32768  
 X\_prescans = 4  
 X\_resolution = 1.19959034[Hz]  
 X\_sweep = 39.3081761[kHz]  
 Irr\_domain = 1H  
 Irr\_freq = 500.15991521[MHz]  
 Irr\_offset = 5.0[ppm]  
 Clipped = FALSE  
 Mod\_return = 1  
 Scans = 512  
 Total\_scans = 512

X\_90\_width = 11.75[us]  
 X\_acq\_time = 0.83361792[s]  
 X\_angle = 30[deg]  
 X\_atn = 7.1[dB]  
 X\_pulse = 3.91666667[us]  
 Irr\_atn\_dec = 19.32[dB]  
 Irr\_atn\_noe = 19.32[dB]  
 Irr\_noise = WALTZ  
 Decoupling = TRUE  
 Initial\_wait = 1[s]  
 Noe = TRUE  
 Noe\_time = 1[s]  
 Recvr\_gain = 58  
 Relaxation\_delay = 1[s]  
 Repetition\_time = 1.83361792[s]  
 Temp\_get = 396.6[dC]

Figure 38 <sup>13</sup>C NMR of Pentanenitrile (2zd)

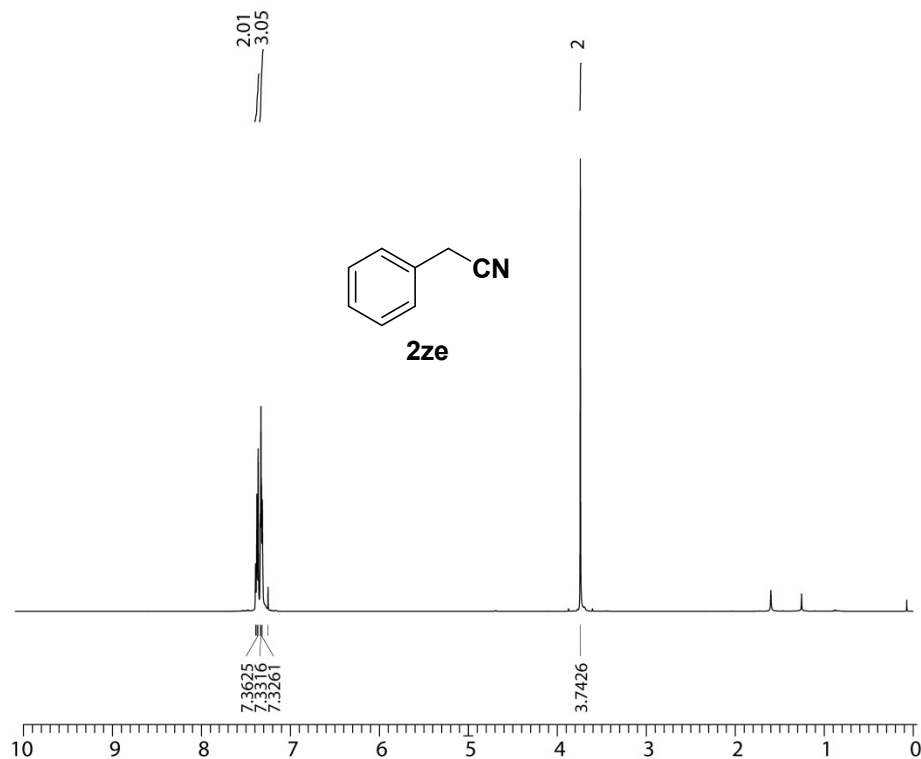

Figure 39  $^1\text{H}$  NMR of 2-Phenylacetonitrile (2ze)

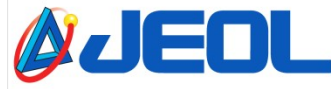

Filename = MMAKPH1\_PROTON-5.jdf  
 Author = RAJA BABU  
 Experiment = single\_pulse.ex2  
 Sample\_id = MMAKPH1  
 Solvent = CHLOROFORM-D  
 Creation\_time = 6-NOV-2021 09:55:23  
 Revision\_time = 7-NOV-2021 22:47:10  
 Current\_time = 7-NOV-2021 22:47:29

Data\_format = 1D COMPLEX  
 Dim\_size = 13107  
 Dim\_title = 1H  
 Dim\_units = [ppm]  
 Dimensions = X  
 Site = ECX 500  
 Spectrometer = DELTA2\_NMR

Field\_strength = 11.7473579[T] (500[MH]  
 X\_acq\_duration = 1.74587904[s]  
 X\_domain = 1H  
 X\_freq = 500.15991521[MHz]  
 X\_offset = 5.0[ppm]  
 X\_points = 16384  
 X\_prescans = 1  
 X\_resolution = 0.52727737[Hz]  
 X\_sweep = 9.38438438[kHz]  
 Irr\_domain = 1H  
 Irr\_freq = 500.15991521[MHz]  
 Irr\_offset = 5.0[ppm]  
 Tri\_domain = 1H  
 Tri\_freq = 500.15991521[MHz]  
 Tri\_offset = 5.0[ppm]  
 Clipped = FALSE  
 Mod\_return = 1  
 Scans = 16  
 Total\_scans = 16

X\_90\_width = 15.75[us]  
 X\_acq\_time = 1.74587904[s]  
 X\_angle = 45[deg]  
 X\_atn = 3.99[dB]  
 X\_pulse = 7.875[us]  
 Irr\_mode = Off  
 Tri\_mode = Off  
 Dante\_presat = FALSE  
 Initial\_wait = 1[s]  
 Recvr\_gain = 44  
 Relaxation\_delay = 1[s]  
 Repetition\_time = 2.74587904[s]  
 Temp\_get = 396.6[dC]

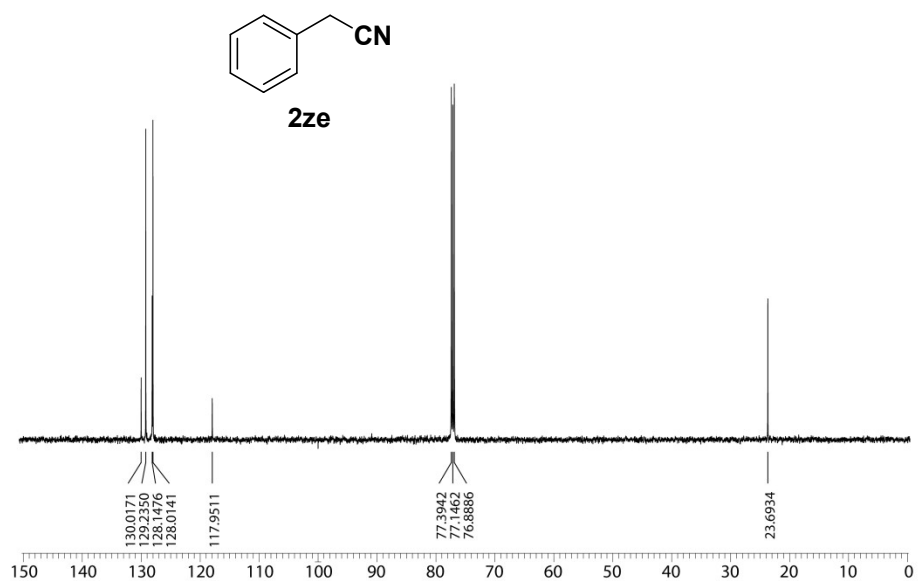

Figure 40  $^{13}\text{C}$  NMR of 2-Phenylacetonitrile (2ze)

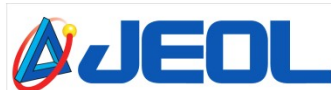

Filename = MMAKPH1\_CARBON-3.jdf  
 Author = RAJA BABU  
 Experiment = single\_pulse\_dec  
 Sample\_id = MMAKPH1  
 Solvent = CHLOROFORM-D  
 Creation\_time = 7-NOV-2021 05:47:55  
 Revision\_time = 7-NOV-2021 23:01:29  
 Current\_time = 7-NOV-2021 23:02:21

Data\_format = 1D COMPLEX  
 Dim\_size = 26214  
 Dim\_title = 13C  
 Dim\_units = [ppm]  
 Dimensions = X  
 Site = ECX 500  
 Spectrometer = DELTA2\_NMR

Field\_strength = 11.7473579[T] (500[MH]  
 X\_acq\_duration = 0.83361792[s]  
 X\_domain = 13C  
 X\_freq = 125.76529768[MHz]  
 X\_offset = 100[ppm]  
 X\_points = 32768  
 X\_prescans = 4  
 X\_resolution = 1.19959034[Hz]  
 X\_sweep = 39.3081761[kHz]  
 Irr\_domain = 1H  
 Irr\_freq = 500.15991521[MHz]  
 Irr\_offset = 5.0[ppm]  
 Clipped = FALSE  
 Mod\_return = 1  
 Scans = 512  
 Total\_scans = 512

X\_90\_width = 11.75[us]  
 X\_acq\_time = 0.83361792[s]  
 X\_angle = 30[deg]  
 X\_atn = 7.1[dB]  
 X\_pulse = 3.91666667[us]  
 Irr\_atn\_dec = 19.32[dB]  
 Irr\_atn\_noe = 19.32[dB]  
 Irr\_noise = WALTZ  
 Decoupling = TRUE  
 Initial\_wait = 1[s]  
 Noe = TRUE  
 Noe\_time = 1[s]  
 Recvr\_gain = 58  
 Relaxation\_delay = 1[s]  
 Repetition\_time = 1.83361792[s]  
 Temp\_get = 396.6[dC]

## References:

1. J. Noh and J. Kim, *J. Org. Chem.*, 2015, **80**, 11624-11628.
2. P. Nimnual, J. Tummatom, C. Thongsornkleeb and S. Ruchirawat, *J. Org. Chem.*, 2015, **80**, 8657-8667.
3. P. Ghosh, B. Saha, G. C. Pariyar, A. Tamang and R. Subba, *Tetrahedron Lett.*, 2016, **57**, 3618-3621.
4. D. J. Quinn, G. J. Haun and G. Moura-Letts, *Tetrahedron Lett.*, 2016, **57**, 3844-3847.
5. E. Niknam, F. Panahi and A. K. Nezhad, *Eur. J. Org. Chem.*, 2020, **18**, 2699-2707.
6. Y. Zhao, G. Mei, H. Wang, G. Zhang and C. Ding, *Synlett.*, 2019, **30**, 1484-1488.
7. R. J. Song, J. C. Wu, Y. Liu, G. B. Deng, C. Y. Wu, W. T. Wei and J. H. Li, *Synlett.*, 2012, **23**, 2491-2496.
8. P. Maity, D. Kundu, T. Ghosh and B. C. Ranu, *Org. Chem. Front.*, 2018, **5**, 1586-1599.
9. Y. Kim, Y. H. Rhee and J. Park, *Org. Biomol. Chem.*, 2017, **15**, 1636-1641.
10. M. Sridhar, M. K. K. Reddy, V. V. Sairam, J. Raveendra, K. R. Godala, C. Narsaiah, C. Ramanaiah and C. S. Reddy, *Tetrahedron Lett.*, 2012, **53**, 3421-3424.
11. V. K. Das, S. N. Harsh and N. Karak, *Tetrahedron Lett.*, 2016, **57**, 549-553.
12. Y. Z. Zhu, X. Q. Zhang, F. Liu, H. M. Gu and H. L. Zhu, *Synth. Commun.*, 2013, **43**, 2943-2948.
